# Supplementary material for: Effect of propofol combined with opioids on cough reflex suppression in gastroscopy: study protocol for a double-blind randomized controlled trial
Source: PubMed Central journal article supplement — BMJ Open. 2017 Sep 1;7(9):e014881. doi: 10.1136/bmjopen-2016-014881 (PMC5589021; doi:10.1136/bmjopen-2016-014881), 2017-09-01
Supplement: bmjopen-2016-014881.draft_revisions.pdf [file bmjopen-2016-014881.draft_revisions.pdf]

# BMJ Open

BMJ Open is committed to open peer review. As part of this commitment we make the peer review history of every article we publish publicly available.

When an article is published we post the peer reviewers' comments and the authors' responses online. We also post the versions of the paper that were used during peer review. These are the versions that the peer review comments apply to.

The versions of the paper that follow are the versions that were submitted during the peer review process. They are not the versions of record or the final published versions. They should not be cited or distributed as the published version of this manuscript.

BMJ Open is an open access journal and the full, final, typeset and author-corrected version of record of the manuscript is available on our site with no access controls, subscription charges or pay-per-view fees (<http://bmjopen.bmj.com>).

If you have any questions on BMJ Open's open peer review process please email [editorial.bmjopen@bmj.com](mailto:editorial.bmjopen@bmj.com)

# BMJ Open

## Effect of propofol combined with opioids on cough reflex suppression in gastroscopy: study protocol for a double-blind randomized controlled trial

|                                 |                                                                                                                                                                                                                                                                                                                                                                                                                                                                                                                                            |
|---------------------------------|--------------------------------------------------------------------------------------------------------------------------------------------------------------------------------------------------------------------------------------------------------------------------------------------------------------------------------------------------------------------------------------------------------------------------------------------------------------------------------------------------------------------------------------------|
| Journal:                        | <i>BMJ Open</i>                                                                                                                                                                                                                                                                                                                                                                                                                                                                                                                            |
| Manuscript ID                   | bmjopen-2016-014881                                                                                                                                                                                                                                                                                                                                                                                                                                                                                                                        |
| Article Type:                   | Protocol                                                                                                                                                                                                                                                                                                                                                                                                                                                                                                                                   |
| Date Submitted by the Author:   | 24-Oct-2016                                                                                                                                                                                                                                                                                                                                                                                                                                                                                                                                |
| Complete List of Authors:       | Yin, Ning; Zhongda Hospital, School of Medicine, Southeast University, Department of Anesthesiology<br>Xia, Jiangyan ; Zhongda Hospital, School of Medicine, Southeast University, Department of Anesthesiology<br>Lu, Xinjian ; Zhongda Hospital, School of Medicine, Southeast University, Department of Anesthesiology<br>Yuan, Jing ; Zhongda Hospital, School of Medicine, Southeast University, Department of Anesthesiology<br>Xie , Jue ; Zhongda Hospital, School of Medicine, Southeast University, Department of Anesthesiology |
| <b>Primary Subject Heading</b>: | Anaesthesia                                                                                                                                                                                                                                                                                                                                                                                                                                                                                                                                |
| Secondary Subject Heading:      | Anaesthesia, Gastroenterology and hepatology                                                                                                                                                                                                                                                                                                                                                                                                                                                                                               |
| Keywords:                       | sedation, propofol, opioids, Endoscopy < GASTROENTEROLOGY                                                                                                                                                                                                                                                                                                                                                                                                                                                                                  |
|                                 |                                                                                                                                                                                                                                                                                                                                                                                                                                                                                                                                            |

SCHOLARONE™  
Manuscripts

only

1  
2  
3  
4 **Effect of propofol combined with opioids on cough reflex suppression in**  
5  
6 **gastroscopy: study protocol for a double-blind randomized controlled trial**  
7  
8  
9

10  
11 Ning Yin, Jiangyan Xia, Xinjian Lu, Jing Yuan, Jue Xie  
12

13  
14  
15  
16 Department of Anesthesiology, Zhongda Hospital, School of Medicine, Southeast  
17  
18 University, Nanjing 210009, China  
19

20  
21  
22  
23  
24 **Corresponding author:**

25  
26 Ning Yin. Phone: +86-25-83272111; Email: dr.ningyin@tom.com; Address: 87  
27

28  
29 Dingjiaqiao Road, Nanjing 210009, Jiangsu, China  
30  
31  
32  
33  
34  
35  
36  
37  
38  
39  
40  
41  
42  
43  
44  
45  
46  
47  
48  
49  
50  
51  
52  
53  
54  
55  
56  
57  
58  
59  
60

## Abstract

**Introduction:** The best methods for analgesia and sedation for gastroscopy are still in debate and finding adequate regimen of sedation/analgesia is important. Stimulation of the larynx under sedation can cause reflex responses. Propofol with opioids has been recommended for gastroscopy sedation but their effects on cough reflex suppression remain to be investigated.

**Objective:** This trial will evaluate the effects of propofol combined with small doses of dezocine, oxycodone, sufentanil, or fentanil for gastroscopy. This study will observe the incidence and reflex degree of cough under sedation and will compare propofol combined with the above drugs to propofol alone and to each other, allowing a broad screen for feasible regimen.

**Methods and analysis:** This will be a prospective, randomized, double-blinded, controlled trial. Patients scheduled for gastroscopy, ASA I-II level, aged 18-65 years will be included. A total of 350 subjects are planned to be randomized to intravenously receive 2-2.2 mg/kg propofol plus 0.5-0.8 ug/kg fentanyl (fentanyl group), 2-2.2 mg/kg propofol plus 0.05-0.08 ug/kg sufentanil (sufentanil group), 2-2.2 mg/kg propofol plus 0.04-0.05 mg/kg dezocine (dezocine group), 2-2.2 mg/kg propofol plus 0.04-0.05 mg/kg oxycodone (oxycodone group), or 2.4-3 mg/kg propofol plus 2-2.5 ml saline (control group) for sedation. The primary endpoint is the incidence and reflex degree of cough. The secondary endpoints include occurrence of discomfort or side effects, whether jaw thrust, assistant ventilation, and additional propofol is used, recovery time, duration of procedure and Steward Score.

1  
2  
3  
4 **Ethics and dissemination:** This study has been approved by the Institutional Ethics  
5  
6 Committee for Clinical Research of Zhongda Hospital, Affiliated to Southeast  
7  
8 University (No. 2015ZDSYLL033.0). The results of the trial will be published in an  
9  
10 international peer-reviewed journal.  
11  
12

13  
14 **Trial registration:** This study was registered with the Chinese Clinical Trial Center  
15  
16 (No. ChiCTR-ICR-15006952).  
17  
18

19  
20  
21 **Keywords:** sedation, endoscopy, propofol, opioids  
22  
23

#### 24 25 26 **Strengths and limitations of this study** 27

28 Double-blinded randomized placebo-controlled study design  
29

30 Aiming to find adequate regimen of sedation and analgesia for gastroscopy  
31  
32

33 Evaluated a wide range of opioids  
34  
35

36 Single-center study  
37  
38  
39  
40  
41  
42  
43  
44  
45  
46  
47  
48  
49  
50  
51  
52  
53  
54  
55  
56  
57  
58  
59  
60

## Introduction

Gastroscopy is an important and common endoscopic method of diagnosis and treatment of digestive diseases. However, during gastroscopy, patients' anxiety and discomfort such as throat irritation, cough, and nausea usually occur, which may affect the endoscopic operation, result in low examination quality, and consequently decrease the willingness of patients to undergo a repeated procedure. Pharyngeal anesthesia and sedation/anesthesia ranging from minimal sedation to general anesthesia have been used to relieve anxiety and discomfort, allowing a successful procedure [1-5].

Currently, endoscopic sedation has been widely applied in routine practice, with propofol sedation being endorsed [5-12]. Propofol is an intravenously administered sedative with a rapid onset and short duration of action [13]. Propofol has a favorable sedative effect and a wide range of inhibition effect on the central nervous system [14]. Propofol also strongly inhibits the contraction of gastrointestinal smooth muscles, antagonizes the vomiting reflex and reduce cough and body movement [5 15 16]. The incidences of postoperative headache, nausea and vomiting are low, and propofol even reduces nausea and vomiting [17]. Therefore, it has been widely used for sedation for gastroscopic procedures. Propofol is often used as a single agent. However, it has short duration of clinical effect, and inadequate sedation with propofol alone is seen, which requires additional doses. The duration of gastroscopy is relatively short, generally lasting for 10 minutes, but repeated addition of propofol can significantly prolong the recovery duration, increasing the risk of post-procedure

1  
2  
3  
4 respiratory depression and hypoxemia, and the workload of recovery management.

5  
6 Use of propofol in combination with opioids has been proposed to improve sedation  
7  
8 and analgesia regarding aspects such as recovery time, sedative effect, pain and other  
9  
10 discomfort [18-22].

11  
12  
13  
14 Cough is a defensive airway reflex. The epithelium cough receptors are sensitive to  
15  
16 both mechanical and chemical stimuli. Sedatives and analgesics have inhibitory effect  
17  
18 on airway reflex. However, propofol may still have chance to cause cough [23 24].

19  
20  
21 Moreover, stimulation of the larynx during propofol anesthesia can cause various  
22  
23 types of reflex responses [25]. Although opioids exert favorable analgesic and  
24  
25 sedative effects [20 26], and can inhibit pharyngeal reflex and stress response,  
26  
27 intravenous fentanyl and sufentanil-induced coughing is not uncommon [27 28]. The  
28  
29 induced cough, can be reduced by reduced by propofol [29] and interestingly, by  
30  
31 another opioid, dezocine [30]. Dezocine is an opioid analgesic acting on  $\mu$ -,  $\delta$ - and  
32  
33  $\kappa$ -opioid receptors and has been used in propofol sedation [31-33]. Oxycodone is an  
34  
35 opioid alkaloid also known to depress cough reflex. Unlike fentanyl and sufentanil,  
36  
37 dezocine and oxycodone have rarely been studied in combination with propofol for  
38  
39 gastroscopy.  
40  
41  
42  
43  
44

45  
46 The best methods for analgesia and sedation for gastroscopy are still in debate and  
47  
48 finding adequate regimen of sedation/analgesia is important, which can influence the  
49  
50 quality of the examination, the patient's cooperation and the patient's and physician's  
51  
52 satisfaction with the sedation [5 16 34]. Based on our preliminary observation in  
53  
54 clinical practice, we hypothesize that combination of propofol and low-dose dezocine,  
55  
56  
57  
58  
59  
60

1  
2  
3  
4  
5  
6  
7  
8  
9  
10  
11  
12  
13  
14  
15  
16  
17  
18  
19  
20  
21  
22  
23  
24  
25  
26  
27  
28  
29  
30  
31  
32  
33  
34  
35  
36  
37  
38  
39  
40  
41  
42  
43  
44  
45  
46  
47  
48  
49  
50  
51  
52  
53  
54  
55  
56  
57  
58  
59  
60

oxycodone or sufentanil for gastroscopy may decrease the incidence of cough.

In order to verify our hypothesis, we designed this clinical study, aiming to investigate the effect of combination of propofol and opioids on cough reflex suppression in gastroscopy.

## **Methods and analysis**

### ***Study objective***

The primary objective of this study is to investigate the incidence and reflex degree of cough under sedation with combination of propofol and fentanyl sufentanil, dezocine, or oxycodone during gastroscopy. The secondary objective is to assess effect of the combination regimens on sedative performance, relieving stress and discomfort, and reducing side effects.

### ***Study location***

A prospective, single-center, randomized, double-blinded, controlled trial will be conducted in patients undergoing gastroscopy in the Affiliated Zhongda Hospital of Southeast University, China.

### ***Study population***

Participants will be recruited voluntarily according to the inclusion and exclusion criteria below.

Inclusion criteria:

Patients scheduled for gastroscopy, ASA I-II level, aged 18-65 years, willing to participate after reading and sign an informed consent.



1  
2  
3  
4 Exclusion criteria:

- 5  
6 1. Body mass index (BMI)  $\geq 30$  kg/m<sup>2</sup>,  
7  
8  
9 2. Patients with preoperative circulatory, respiratory or nervous system diseases,  
10  
11 3. Preoperative hemoglobin level less than 70 g/L or albumin level less than 30 g/L  
12  
13  
14 4. Patients with sleep apnea syndrome.

15  
16 ***Randomization and blinding***

17  
18 Stratified randomization will be used to assign the candidate subjects to five groups  
19  
20 according to sex and BMI (two groups or three groups). Computer-generated random  
21  
22 group numbers will be printed and placed into different sealed envelope in turn. When  
23  
24 receiving a subject who met the inclusion criteria, the anesthesiologist determined the  
25  
26 grouping of the newly recruited subject according to different group numbers in the  
27  
28 envelopes. The regimen will be blind to both anesthesiologists and patients.  
29  
30  
31

32  
33 ***Current sample size justification***

34  
35 A total of 350 subjects were planned to be involved. The subjects will be randomly  
36  
37 divided into 5 groups: dezocine group, fentanyl group, oxycodone group, sufentanil  
38  
39 and the control group, 70 cases in each group. The sample size was estimated  
40  
41 according to the chi-square test of the incidence of the primary categorical outcome,  
42  
43 incidence of cough within 5 min after endoscope insertion. The above total number of  
44  
45 observations makes it possible to detect small to moderate effective size  
46  
47 (approximately 0.20) with Type I error 5% and power of test 90%. The test of power  
48  
49 will remain 80% or higher when up to 20% of the subjects dropout from the study.  
50  
51  
52  
53  
54

55  
56 ***Statistical analysis***

1  
2  
3  
4 All data will be analyzed using SAS 9.3 or other statistical software packages as  
5  
6 needed. The statistical methods included descriptive statistics, t-test,  $\chi^2$  test, analysis  
7  
8 of variance, univariate unconditional logistic regression analysis, multivariate linear  
9  
10 regression analysis. A significance level is set at 5%.

### 13 ***Sedation***

14  
15  
16 Patients will fast for twelve hours before gastroscopy. Dyclonine will be orally taken  
17  
18 10 minutes prior to sedation. The right upper extremity venous access will be  
19  
20 established before the patients enter the operation room. After entering the operation  
21  
22 room, the patients will lie in the left-lateral position, with the blood pressure cuff tied  
23  
24 to the left upper arm, and receive oxygen inhalation via nasal cannula (3-5 L/min).  
25  
26 After placement of bite block, blood pressure, heart rate, and SpO<sub>2</sub> will be measured  
27  
28 noninvasively (Philips MP50, Germany) to set up baselines and will be monitored  
29  
30 throughout the operation afterwards. Blood pressure will be measured at an interval of  
31  
32 1 minute. Then patients will intravenously receive 2-2.2 mg/kg propofol (Fresenius  
33  
34 Kabi AB, Germany) plus 0.5-0.8 ug/kg fentanyl (Humanwell Pharmaceutical, China),  
35  
36 2-2.2 mg/kg propofol plus 0.05-0.08 ug/kg sufentanil (Humanwell Pharmaceutical,  
37  
38 China), 2-2.2 mg/kg propofol plus 0.04-0.05 mg/kg dezocine (Yangtze River  
39  
40 Pharmaceutical, China), 2-2.2 mg/kg propofol plus 0.04-0.05 mg/kg oxycodone  
41  
42 (Monti Pharmaceutical, China), or 2.4-3 mg/kg propofol plus 2-2.5 ml saline. All  
43  
44 drugs will be diluted with saline. The doses of dezocine and oxycodone are defined  
45  
46 according to our preliminary study. The 2 ml of normal saline is for subjects weighing  
47  
48  $\leq 70$  kg, and the 2.5 ml of normal saline is for subjects weighing  $> 70$  kg. Fentanyl will  
49  
50  
51  
52  
53  
54  
55  
56  
57  
58  
59  
60

1  
2  
3  
4 be diluted to 20 ug/ml, sufentanil to 2.5ug/ml, dezocine and oxycodone each to 1  
5  
6 mg/ml. Drugs will be delivered by the Aespire 7900 anesthesia delivery system (GE  
7  
8 Healthcare, USA).

### 11 *Adverse events*

12  
13 All adverse events will be recorded and closely monitored. Medical strategy will be  
14  
15 adjusted if necessary. Unexpected severe adverse events will be reported to the ethics  
16  
17 committee.  
18  
19

### 21 *Data collection and management*

22  
23 Demographic variables and clinical data will be collected from all patients.  
24  
25 Furthermore, outcome related variables as well as variables that may influence the  
26  
27 outcome will be collected. All data will be collected throughout the study and will be  
28  
29 securely managed in confidential conditions. The participants will be referred by the  
30  
31 participant number rather than names, throughout the study unless otherwise specified.  
32  
33  
34 All relevant documents and files will be archived for five years. Data can be only  
35  
36 accessed by the investigators who sign the confidential disclosure agreement and  
37  
38 institutional or governmental auditors during the study. Data without patient  
39  
40 identification will be publicly accessible after the study. The process will be  
41  
42 monitored by the Institutional Ethics Committee (ICE) for Clinical Research of  
43  
44 Zhongda Hospital.  
45  
46  
47  
48  
49

### 51 *Endpoints*

52  
53 The primary endpoint is the incidence and reflex degree of cough, which will be  
54  
55 recorded within 5 min after endoscope insertion and throughout the procedure. The  
56  
57  
58  
59  
60

1  
2  
3  
4 secondary endpoints include (1) the occurrence of swallowing, body movement, and  
5  
6 other discomfort or side effects and whether jaw thrust, assistant ventilation, and  
7  
8 additional propofol is used, which will be recorded within five minutes after  
9  
10 endoscope insertion and throughout the procedure, and (2) duration of calls for eyes  
11  
12 open, the duration of procedure and Steward score [35] after eyes open. Blood  
13  
14 pressure, heart rate and SpO<sub>2</sub> will be monitored throughout the process  
15  
16  
17

### 18 ***Protocol amendments***

19  
20 Any changes of the protocol during the trial that may affect the conduct of the trial,  
21  
22 the safety and the benefit of the patients will require a formal amendment to the  
23  
24 protocol.  
25  
26  
27  
28  
29  
30

### 31 **Discussion**

32  
33 It is important to improve analgesia and sedation for gastroscopy. Opioids, which  
34  
35 exert favorable analgesic, sedative effect and inhibit the stress response, are an  
36  
37 important part of surgical anesthesia. The combination of opioids and propofol is the  
38  
39 most commonly used regimen for general anesthesia. Currently, a small dose of  
40  
41 fentanyl combined with propofol in sedation for gastroscopy have been used in  
42  
43 clinical practice. However, fentanyl has the potential risks of respiratory depression,  
44  
45 choking and the stiffness of chest wall muscles. Clinical study on other opioids for  
46  
47 gastroscopy, such as oxycodone, dezocine and sufentanil, is inadequate. Finding an  
48  
49 adequate regimen is essential. Herein, we conduct this trial to evaluate the  
50  
51 combination of small doses of dezocine, oxycodone or sufentanil for gastroscopy.  
52  
53  
54  
55  
56  
57  
58  
59  
60

1  
2  
3  
4 This study observes the incidence and reflex degree of cough under sedation. This  
5  
6 trial compares propofol combined the above drugs to propofol alone and to propofol  
7  
8 with fentanil, allowing a broad screen for feasible regimen. There are limitations of  
9  
10 this study. This is a single-center, which may limit the generalization of this study.  
11  
12 Future multiple-center large-sample size study will be needed. The result of this  
13  
14 clinical trial can confirm the favorable effects of combination of propofol with  
15  
16 small-dose opioids, and can contribute to finding satisfying regimens for sedation for  
17  
18 gastroscopy.  
19  
20  
21  
22  
23  
24  
25

#### 26 **Trial status**

27  
28 At the time of manuscript submission, the study is in the recruitment phase.  
29  
30  
31  
32  
33

#### 34 **Ethics and dissemination**

35  
36 This study has been approved by the Institutional Ethics Committee (ICE) for Clinical  
37  
38 Research of Zhongda Hospital, Affiliated to Southeast University (No.  
39  
40 2015ZDSYLL033.0) and is registered with the Chinese Clinical Trial Center  
41  
42 (ChiCTR-ICR-15006952). Only patients who give written informed consent will be  
43  
44 recruited. The results of the trial will be published in an international peer-reviewed  
45  
46 journal.  
47  
48  
49  
50  
51  
52  
53

#### 54 **Authors' contributions**

55  
56 NY conceived of the study. NY and JX participated in its design and coordination. NY,  
57  
58  
59  
60

1  
2  
3 JX, XL, JY and JX collected references and figured out the protocol. XL, JY and JX  
4  
5 performed statistics analysis. NY and JX drafted the manuscript. All authors read and  
6  
7 approved the final manuscript.  
8  
9  
10

### 11 12 13 **Funding**

14  
15 This research received no specific grant from any funding agency in the public,  
16  
17 commercial or not-for-profit sectors.  
18  
19  
20

### 21 22 23 **Competing interests**

24  
25 The authors declare that they have no competing interests. The committee mentioned  
26  
27 is independent from the sponsor and competing interests  
28  
29  
30  
31  
32  
33  
34  
35  
36  
37  
38  
39  
40  
41  
42  
43  
44  
45  
46  
47  
48  
49  
50  
51  
52  
53  
54  
55  
56  
57  
58  
59  
60

## References

1. Standards of Practice Committee of the American Society for Gastrointestinal E, Lichtenstein DR, Jagannath S, et al. Sedation and anesthesia in GI endoscopy. *Gastrointest Endosc* 2008;**68**:815-26.
2. Soma Y, Saito H, Kishibe T, Takahashi T, Tanaka H, Munakata A. Evaluation of topical pharyngeal anesthesia for upper endoscopy including factors associated with patient tolerance. *Gastrointest Endosc* 2001;**53**:14-8.
3. Froehlich F, Schwizer W, Thorens J, Kohler M, Gonvers JJ, Fried M. Conscious sedation for gastroscopy: patient tolerance and cardiorespiratory parameters. *Gastroenterology* 1995;**108**:697-704.
4. Evans LT, Saberi S, Kim HM, Elta GH, Schoenfeld P. Pharyngeal anesthesia during sedated EGDs: is "the spray" beneficial? A meta-analysis and systematic review. *Gastrointest Endosc* 2006;**63**:761-6.
5. Triantafyllidis JK, Merikas E, Nikolakis D, Papalois AE. Sedation in gastrointestinal endoscopy: current issues. *World J Gastroenterol* 2013;**19**:463-81.
6. Porostocky P, Chiba N, Colacino P, Sadowski D, Singh H. A survey of sedation practices for colonoscopy in Canada. *Can J Gastroenterol* 2011;**25**:255-60.
7. Fanti L, Agostoni M, Gemma M, et al. Sedation and monitoring for gastrointestinal endoscopy: A nationwide web survey in Italy. *Dig Liver Dis* 2011;**43**:726-30.
8. Paspatis GA, Manolaraki MM, Tribonias G, et al. Endoscopic sedation in Greece: results from a nationwide survey for the Hellenic Foundation of

- 1  
2  
3  
4 gastroenterology and nutrition. *Dig Liver Dis* 2009;**41**:807-11.
- 5  
6 9. Cohen LB, Wechsler JS, Gaetano JN, et al. Endoscopic sedation in the United States:  
7  
8 results from a nationwide survey. *Am J Gastroenterol* 2006;**101**:967-74.
- 9  
10  
11 10. Riphhaus A, Rabofski M, Wehrmann T. Endoscopic sedation and monitoring  
12  
13 practice in Germany: results from the first nationwide survey. *Z*  
14  
15 *Gastroenterol* 2010;**48**:392-7.
- 16  
17  
18 11. Baudet JS, Borque P, Borja E, et al. Use of sedation in gastrointestinal endoscopy:  
19  
20 a nationwide survey in Spain. *Eur J Gastroenterol Hepatol* 2009;**21**:882-8.
- 21  
22  
23 12. Wehrmann T, Triantafyllou K. Propofol sedation in gastrointestinal endoscopy: a  
24  
25 gastroenterologist's perspective. *Digestion* 2010;**82**:106-9.
- 26  
27  
28 13. Byrne MF, Chiba N, Singh H, Sadowski DC, Clinical Affairs Committee of the  
29  
30 Canadian Association of G. Propofol use for sedation during endoscopy in  
31  
32 adults: a Canadian Association of Gastroenterology position statement. *Can J*  
33  
34 *Gastroenterol* 2008;**22**:457-9.
- 35  
36  
37 14. Inada T, Murao K, Shingu K, Yamada K, Nakao S, Nagata A. Effects of propofol  
38  
39 and thiopental on the central nervous system during nociceptive stimulation  
40  
41 in cats. *J Anesth* 2001;**15**:159-63.
- 42  
43  
44 15. Lee TL, Ang SB, Dambisya YM, Adaikan GP, Lau LC. The effect of propofol on  
45  
46 human gastric and colonic muscle contractions. *Anesth Analg*  
47  
48 1999;**89**:1246-9.
- 49  
50  
51 16. Fanti L, Testoni PA. Sedation and analgesia in gastrointestinal endoscopy: what's  
52  
53 new? *World J Gastroenterol* 2010;**16**:2451-7.
- 54  
55  
56  
57  
58  
59  
60



- 1  
2  
3  
4 17. Cohen LB, Delege MH, Aisenberg J, et al. AGA Institute review of endoscopic  
5  
6 sedation. *Gastroenterology* 2007;**133**:675-701.  
7  
8  
9 18. Ho WM, Yen CM, Lan CH, et al. Comparison between the recovery time of  
10  
11 alfentanil and fentanyl in balanced propofol sedation for gastrointestinal and  
12  
13 colonoscopy: a prospective, randomized study. *BMC Gastroenterol*  
14  
15 2012;**12**:164.  
16  
17  
18 19. Poulos JE, Kalogerinis PT, Caudle JN. Propofol compared with combination  
19  
20 propofol or midazolam/fentanyl for endoscopy in a community setting. *AANA*  
21  
22 *J* 2013;**81**:31-6.  
23  
24  
25 20. Zhang L, Bao Y, Shi D. Comparing the pain of propofol via different  
26  
27 combinations of fentanyl, sufentanil or remifentanyl in gastrointestinal  
28  
29 endoscopy. *Acta Cir Bras* 2014;**29**:675-80.  
30  
31  
32 21. Xu ZY, Wang X, Si YY, et al. Intravenous remifentanyl and propofol for  
33  
34 gastroscopy. *J Clin Anesth* 2008;**20**:352-5.  
35  
36  
37 22. LaPierre CD, Johnson KB, Randall BR, Egan TD. A simulation study of common  
38  
39 propofol and propofol-opioid dosing regimens for upper endoscopy:  
40  
41 implications on the time course of recovery. *Anesthesiology*  
42  
43 2012;**117**:252-62.  
44  
45  
46 23. Yamamoto S, Motokawa K, Toyooka H. Propofol may cause coughing when used  
47  
48 as a sedative in patients undergoing orthopedic surgery under spinal  
49  
50 anesthesia. *Anesthesia & Analgesia* 1998;**86**:529S.  
51  
52  
53 24. Mitra S, Sinha PK, Anand LK, Gombar KK. Propofol-induced violent coughing.  
54  
55  
56  
57  
58  
59  
60

- 1  
2  
3  
4 *Anaesthesia* 2000;**55**:707-8.
- 5  
6 25. Tagaito Y, Isono S, Nishino T. Upper airway reflexes during a combination of  
7  
8 propofol and fentanyl anesthesia. *The Journal of the American Society of*  
9  
10 *Anesthesiologists* 1998;**88**:1459-66.
- 11  
12  
13 26. Koshy G, Nair S, Norkus EP, Hertan HI, Pitchumoni CS. Propofol versus  
14  
15 midazolam and meperidine for conscious sedation in GI endoscopy. *Am J*  
16  
17 *Gastroenterol* 2000;**95**:1476-9.
- 18  
19  
20 27. Yemen TA. Small doses of sufentanil will produce violent coughing in young  
21  
22 children. *Anesthesiology* 1998;**89**:271-2.
- 23  
24  
25 28. Bohrer H, Fleischer F, Werning P. Tussive effect of a fentanyl bolus administered  
26  
27 through a central venous catheter. *Anaesthesia* 1990;**45**:18-21.
- 28  
29  
30 29. Sedighinejad A, Naderi Nabi B, Haghghi M, et al. Propofol is Effective to  
31  
32 Depress Fentanyl-Induced Cough during Induction of Anesthesia. *Anesth*  
33  
34 *Pain Med* 2013;**2**:170-3.
- 35  
36  
37 30. Liu XS, Xu GH, Shen QY, et al. Dezocine prevents sufentanil-induced cough  
38  
39 during general anesthesia induction: A randomized controlled trial.  
40  
41 *Pharmacol Rep* 2015;**67**:52-5.
- 42  
43  
44 31. Ramirez-Ruiz M, Smith I, White PF. Use of analgesics during propofol sedation: a  
45  
46 comparison of ketorolac, dezocine, and fentanyl. *J Clin Anesth* 1995;**7**:481-5.
- 47  
48  
49 32. Lu Y, Ye Z, Wong GT, Dong C, Yu J. Prevention of injection pain due to propofol  
50  
51 by dezocine: a comparison with lidocaine. *Indian J Pharmacol*  
52  
53 2013;**45**:619-21.  
54  
55  
56  
57  
58  
59  
60

- 1  
2  
3  
4 33. Zheng M, Guo Y, Shan S, Yang S. Dezocine for anesthesia and stress reduction in  
5  
6 induced abortion. *Patient Prefer Adherence* 2015;**9**:369-72.  
7  
8  
9 34. Bell GD. Preparation, premedication, and surveillance. *Endoscopy* 2004;**36**:23-31.  
10  
11 35. Steward DJ. A simplified scoring system for the post-operative recovery room.  
12  
13 *Can Anaesth Soc J* 1975;**22**:111-3.  
14  
15  
16  
17  
18  
19  
20  
21  
22  
23  
24  
25  
26  
27  
28  
29  
30  
31  
32  
33  
34  
35  
36  
37  
38  
39  
40  
41  
42  
43  
44  
45  
46  
47  
48  
49  
50  
51  
52  
53  
54  
55  
56  
57  
58  
59  
60

1  
2  
3 **Figure Legend**  
4

5 Figure 1. Follow chart of the study.  
6  
7  
8  
9  
10  
11  
12  
13  
14  
15  
16  
17  
18  
19  
20  
21  
22  
23  
24  
25  
26  
27  
28  
29  
30  
31  
32  
33  
34  
35  
36  
37  
38  
39  
40  
41  
42  
43  
44  
45  
46  
47  
48  
49  
50  
51  
52  
53  
54  
55  
56  
57  
58  
59  
60

For peer review only

1  
2  
3  
4  
5  
6  
7  
8  
9  
10  
11  
12  
13  
14  
15  
16  
17  
18  
19  
20  
21  
22  
23  
24  
25  
26  
27  
28  
29  
30  
31  
32  
33  
34  
35  
36  
37  
38  
39  
40  
41  
42  
43  
44  
45  
46  
47  
48  
49  
50  
51  
52  
53  
54  
55  
56  
57  
58  
59  
60

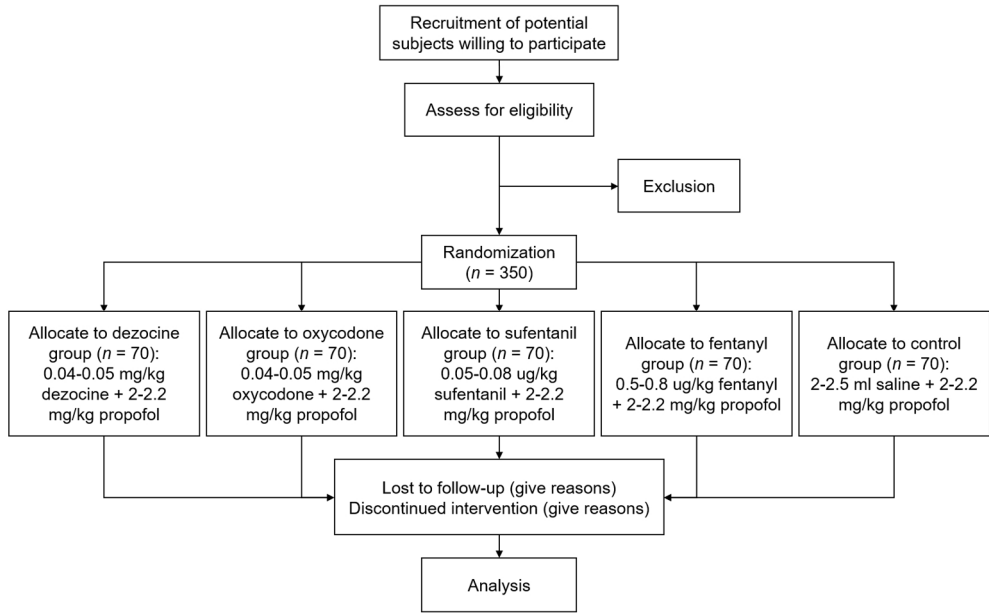

Figure 1. Follow chart of the study.

292x182mm (150 x 150 DPI)

Review only

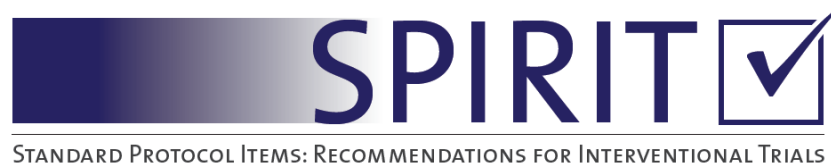

SPIRIT 2013 Checklist: Recommended items to address in a clinical trial protocol and related documents\*

| Section/item                      | Item No | Description                                                                                                                                                                                                                                                                              | Addressed on page number |
|-----------------------------------|---------|------------------------------------------------------------------------------------------------------------------------------------------------------------------------------------------------------------------------------------------------------------------------------------------|--------------------------|
| <b>Administrative information</b> |         |                                                                                                                                                                                                                                                                                          |                          |
| Title                             | 1       | Descriptive title identifying the study design, population, interventions, and, if applicable, trial acronym                                                                                                                                                                             | ___ 1 ___                |
| Trial registration                | 2a      | Trial identifier and registry name. If not yet registered, name of intended registry                                                                                                                                                                                                     | ___ 3 ___                |
|                                   | 2b      | All items from the World Health Organization Trial Registration Data Set                                                                                                                                                                                                                 | ___ NA ___               |
| Protocol version                  | 3       | Date and version identifier                                                                                                                                                                                                                                                              | ___ 10 ___               |
| Funding                           | 4       | Sources and types of financial, material, and other support                                                                                                                                                                                                                              | ___ NA ___               |
| Roles and responsibilities        | 5a      | Names, affiliations, and roles of protocol contributors                                                                                                                                                                                                                                  | ___ 1 ___                |
|                                   | 5b      | Name and contact information for the trial sponsor                                                                                                                                                                                                                                       | ___ NA ___               |
|                                   | 5c      | Role of study sponsor and funders, if any, in study design; collection, management, analysis, and interpretation of data; writing of the report; and the decision to submit the report for publication, including whether they will have ultimate authority over any of these activities | ___ NA ___               |
|                                   | 5d      | Composition, roles, and responsibilities of the coordinating centre, steering committee, endpoint adjudication committee, data management team, and other individuals or groups overseeing the trial, if applicable (see Item 21a for data monitoring committee)                         | ___ 9, 11 ___            |

|    |                                                           |     |                                                                                                                                                                                                                                                                                                                                                                                |                    |
|----|-----------------------------------------------------------|-----|--------------------------------------------------------------------------------------------------------------------------------------------------------------------------------------------------------------------------------------------------------------------------------------------------------------------------------------------------------------------------------|--------------------|
| 1  | <b>Introduction</b>                                       |     |                                                                                                                                                                                                                                                                                                                                                                                |                    |
| 2  |                                                           |     |                                                                                                                                                                                                                                                                                                                                                                                |                    |
| 3  | Background and rationale                                  | 6a  | Description of research question and justification for undertaking the trial, including summary of relevant studies (published and unpublished) examining benefits and harms for each intervention                                                                                                                                                                             | ____ 4-5 ____      |
| 4  |                                                           | 6b  | Explanation for choice of comparators                                                                                                                                                                                                                                                                                                                                          | ____ 5 ____        |
| 5  | Objectives                                                | 7   | Specific objectives or hypotheses                                                                                                                                                                                                                                                                                                                                              | ____ 5-6 ____      |
| 6  |                                                           | 8   | Description of trial design including type of trial (eg, parallel group, crossover, factorial, single group), allocation ratio, and framework (eg, superiority, equivalence, noninferiority, exploratory)                                                                                                                                                                      | ____ 6 ____        |
| 7  |                                                           |     |                                                                                                                                                                                                                                                                                                                                                                                |                    |
| 8  | <b>Methods: Participants, interventions, and outcomes</b> |     |                                                                                                                                                                                                                                                                                                                                                                                |                    |
| 9  | Study setting                                             | 9   | Description of study settings (eg, community clinic, academic hospital) and list of countries where data will be collected. Reference to where list of study sites can be obtained                                                                                                                                                                                             | ____ 6 ____        |
| 10 |                                                           | 10  | Inclusion and exclusion criteria for participants. If applicable, eligibility criteria for study centres and individuals who will perform the interventions (eg, surgeons, psychotherapists)                                                                                                                                                                                   | ____ 6 ____        |
| 11 | Interventions                                             | 11a | Interventions for each group with sufficient detail to allow replication, including how and when they will be administered                                                                                                                                                                                                                                                     | ____ 8 ____        |
| 12 |                                                           | 11b | Criteria for discontinuing or modifying allocated interventions for a given trial participant (eg, drug dose change in response to harms, participant request, or improving/worsening disease)                                                                                                                                                                                 | ____ 9 ____        |
| 13 |                                                           | 11c | Strategies to improve adherence to intervention protocols, and any procedures for monitoring adherence (eg, drug tablet return, laboratory tests)                                                                                                                                                                                                                              | ____ 8 ____        |
| 14 |                                                           | 11d | Relevant concomitant care and interventions that are permitted or prohibited during the trial                                                                                                                                                                                                                                                                                  | ____ NA ____       |
| 15 | Outcomes                                                  | 12  | Primary, secondary, and other outcomes, including the specific measurement variable (eg, systolic blood pressure), analysis metric (eg, change from baseline, final value, time to event), method of aggregation (eg, median, proportion), and time point for each outcome. Explanation of the clinical relevance of chosen efficacy and harm outcomes is strongly recommended | ____ 9 ____        |
| 16 |                                                           | 13  | Time schedule of enrolment, interventions (including any run-ins and washouts), assessments, and visits for participants. A schematic diagram is highly recommended (see Figure)                                                                                                                                                                                               | ____ Figure 1 ____ |
| 17 |                                                           |     |                                                                                                                                                                                                                                                                                                                                                                                |                    |
| 18 |                                                           |     |                                                                                                                                                                                                                                                                                                                                                                                |                    |
| 19 |                                                           |     |                                                                                                                                                                                                                                                                                                                                                                                |                    |
| 20 |                                                           |     |                                                                                                                                                                                                                                                                                                                                                                                |                    |
| 21 |                                                           |     |                                                                                                                                                                                                                                                                                                                                                                                |                    |
| 22 |                                                           |     |                                                                                                                                                                                                                                                                                                                                                                                |                    |
| 23 |                                                           |     |                                                                                                                                                                                                                                                                                                                                                                                |                    |
| 24 |                                                           |     |                                                                                                                                                                                                                                                                                                                                                                                |                    |
| 25 |                                                           |     |                                                                                                                                                                                                                                                                                                                                                                                |                    |
| 26 |                                                           |     |                                                                                                                                                                                                                                                                                                                                                                                |                    |
| 27 |                                                           |     |                                                                                                                                                                                                                                                                                                                                                                                |                    |
| 28 |                                                           |     |                                                                                                                                                                                                                                                                                                                                                                                |                    |
| 29 |                                                           |     |                                                                                                                                                                                                                                                                                                                                                                                |                    |
| 30 |                                                           |     |                                                                                                                                                                                                                                                                                                                                                                                |                    |
| 31 |                                                           |     |                                                                                                                                                                                                                                                                                                                                                                                |                    |
| 32 |                                                           |     |                                                                                                                                                                                                                                                                                                                                                                                |                    |
| 33 |                                                           |     |                                                                                                                                                                                                                                                                                                                                                                                |                    |
| 34 |                                                           |     |                                                                                                                                                                                                                                                                                                                                                                                |                    |
| 35 |                                                           |     |                                                                                                                                                                                                                                                                                                                                                                                |                    |
| 36 |                                                           |     |                                                                                                                                                                                                                                                                                                                                                                                |                    |
| 37 |                                                           |     |                                                                                                                                                                                                                                                                                                                                                                                |                    |
| 38 |                                                           |     |                                                                                                                                                                                                                                                                                                                                                                                |                    |
| 39 |                                                           |     |                                                                                                                                                                                                                                                                                                                                                                                |                    |
| 40 |                                                           |     |                                                                                                                                                                                                                                                                                                                                                                                |                    |
| 41 |                                                           |     |                                                                                                                                                                                                                                                                                                                                                                                |                    |
| 42 |                                                           |     |                                                                                                                                                                                                                                                                                                                                                                                |                    |
| 43 |                                                           |     |                                                                                                                                                                                                                                                                                                                                                                                |                    |
| 44 |                                                           |     |                                                                                                                                                                                                                                                                                                                                                                                |                    |
| 45 |                                                           |     |                                                                                                                                                                                                                                                                                                                                                                                |                    |
| 46 |                                                           |     |                                                                                                                                                                                                                                                                                                                                                                                |                    |
| 47 |                                                           |     |                                                                                                                                                                                                                                                                                                                                                                                |                    |

1 Sample size 14 Estimated number of participants needed to achieve study objectives and how it was determined, including \_\_\_\_\_7\_\_\_\_\_  
 2 clinical and statistical assumptions supporting any sample size calculations

3  
 4 Recruitment 15 Strategies for achieving adequate participant enrolment to reach target sample size \_\_\_\_\_6\_\_\_\_\_  
 5  
 6

### 7 **Methods: Assignment of interventions (for controlled trials)**

#### 8 Allocation:

9  
 10  
 11 Sequence 16a Method of generating the allocation sequence (eg, computer-generated random numbers), and list of any \_\_\_\_\_7\_\_\_\_\_  
 12 generation factors for stratification. To reduce predictability of a random sequence, details of any planned restriction  
 13 (eg, blocking) should be provided in a separate document that is unavailable to those who enrol participants  
 14 or assign interventions  
 15

16  
 17 Allocation 16b Mechanism of implementing the allocation sequence (eg, central telephone; sequentially numbered, \_\_\_\_\_7\_\_\_\_\_  
 18 concealment opaque, sealed envelopes), describing any steps to conceal the sequence until interventions are assigned  
 19 mechanism  
 20

21 Implementation 16c Who will generate the allocation sequence, who will enrol participants, and who will assign participants to \_\_\_\_\_7\_\_\_\_\_  
 22 interventions  
 23

24 Blinding (masking) 17a Who will be blinded after assignment to interventions (eg, trial participants, care providers, outcome \_\_\_\_\_7\_\_\_\_\_  
 25 assessors, data analysts), and how  
 26

27  
 28 17b If blinded, circumstances under which unblinding is permissible, and procedure for revealing a participant's \_\_\_\_\_NA\_\_\_\_\_  
 29 allocated intervention during the trial  
 30

### 31 **Methods: Data collection, management, and analysis**

32  
 33  
 34 Data collection 18a Plans for assessment and collection of outcome, baseline, and other trial data, including any related \_\_\_\_\_9\_\_\_\_\_  
 35 methods processes to promote data quality (eg, duplicate measurements, training of assessors) and a description of  
 36 study instruments (eg, questionnaires, laboratory tests) along with their reliability and validity, if known.  
 37 Reference to where data collection forms can be found, if not in the protocol  
 38

39  
 40 18b Plans to promote participant retention and complete follow-up, including list of any outcome data to be \_\_\_\_\_9\_\_\_\_\_  
 41 collected for participants who discontinue or deviate from intervention protocols  
 42  
 43  
 44



|    |                                 |     |                                                                                                                                                                                                                                                                                                                                       |                 |
|----|---------------------------------|-----|---------------------------------------------------------------------------------------------------------------------------------------------------------------------------------------------------------------------------------------------------------------------------------------------------------------------------------------|-----------------|
| 1  | Data management                 | 19  | Plans for data entry, coding, security, and storage, including any related processes to promote data quality (eg, double data entry; range checks for data values). Reference to where details of data management procedures can be found, if not in the protocol                                                                     | _____9_____     |
| 2  |                                 |     |                                                                                                                                                                                                                                                                                                                                       |                 |
| 3  |                                 |     |                                                                                                                                                                                                                                                                                                                                       |                 |
| 4  |                                 |     |                                                                                                                                                                                                                                                                                                                                       |                 |
| 5  | Statistical methods             | 20a | Statistical methods for analysing primary and secondary outcomes. Reference to where other details of the statistical analysis plan can be found, if not in the protocol                                                                                                                                                              | _____8_____     |
| 6  |                                 |     |                                                                                                                                                                                                                                                                                                                                       |                 |
| 7  |                                 |     |                                                                                                                                                                                                                                                                                                                                       |                 |
| 8  |                                 | 20b | Methods for any additional analyses (eg, subgroup and adjusted analyses)                                                                                                                                                                                                                                                              | _____NA_____    |
| 9  |                                 |     |                                                                                                                                                                                                                                                                                                                                       |                 |
| 10 |                                 | 20c | Definition of analysis population relating to protocol non-adherence (eg, as randomised analysis), and any statistical methods to handle missing data (eg, multiple imputation)                                                                                                                                                       | _____8_____     |
| 11 |                                 |     |                                                                                                                                                                                                                                                                                                                                       |                 |
| 12 |                                 |     |                                                                                                                                                                                                                                                                                                                                       |                 |
| 13 |                                 |     |                                                                                                                                                                                                                                                                                                                                       |                 |
| 14 |                                 |     |                                                                                                                                                                                                                                                                                                                                       |                 |
| 15 | <b>Methods: Monitoring</b>      |     |                                                                                                                                                                                                                                                                                                                                       |                 |
| 16 |                                 |     |                                                                                                                                                                                                                                                                                                                                       |                 |
| 17 | Data monitoring                 | 21a | Composition of data monitoring committee (DMC); summary of its role and reporting structure; statement of whether it is independent from the sponsor and competing interests; and reference to where further details about its charter can be found, if not in the protocol. Alternatively, an explanation of why a DMC is not needed | _____9, 11_____ |
| 18 |                                 |     |                                                                                                                                                                                                                                                                                                                                       |                 |
| 19 |                                 |     |                                                                                                                                                                                                                                                                                                                                       |                 |
| 20 |                                 |     |                                                                                                                                                                                                                                                                                                                                       |                 |
| 21 |                                 |     |                                                                                                                                                                                                                                                                                                                                       |                 |
| 22 |                                 | 21b | Description of any interim analyses and stopping guidelines, including who will have access to these interim results and make the final decision to terminate the trial                                                                                                                                                               | _____9_____     |
| 23 |                                 |     |                                                                                                                                                                                                                                                                                                                                       |                 |
| 24 |                                 |     |                                                                                                                                                                                                                                                                                                                                       |                 |
| 25 |                                 |     |                                                                                                                                                                                                                                                                                                                                       |                 |
| 26 | Harms                           | 22  | Plans for collecting, assessing, reporting, and managing solicited and spontaneously reported adverse events and other unintended effects of trial interventions or trial conduct                                                                                                                                                     | _____9_____     |
| 27 |                                 |     |                                                                                                                                                                                                                                                                                                                                       |                 |
| 28 |                                 |     |                                                                                                                                                                                                                                                                                                                                       |                 |
| 29 | Auditing                        | 23  | Frequency and procedures for auditing trial conduct, if any, and whether the process will be independent from investigators and the sponsor                                                                                                                                                                                           | _____9_____     |
| 30 |                                 |     |                                                                                                                                                                                                                                                                                                                                       |                 |
| 31 |                                 |     |                                                                                                                                                                                                                                                                                                                                       |                 |
| 32 |                                 |     |                                                                                                                                                                                                                                                                                                                                       |                 |
| 33 | <b>Ethics and dissemination</b> |     |                                                                                                                                                                                                                                                                                                                                       |                 |
| 34 |                                 |     |                                                                                                                                                                                                                                                                                                                                       |                 |
| 35 | Research ethics approval        | 24  | Plans for seeking research ethics committee/institutional review board (REC/IRB) approval                                                                                                                                                                                                                                             | _____11_____    |
| 36 |                                 |     |                                                                                                                                                                                                                                                                                                                                       |                 |
| 37 |                                 |     |                                                                                                                                                                                                                                                                                                                                       |                 |
| 38 | Protocol amendments             | 25  | Plans for communicating important protocol modifications (eg, changes to eligibility criteria, outcomes, analyses) to relevant parties (eg, investigators, REC/IRBs, trial participants, trial registries, journals, regulators)                                                                                                      | _____10_____    |
| 39 |                                 |     |                                                                                                                                                                                                                                                                                                                                       |                 |
| 40 |                                 |     |                                                                                                                                                                                                                                                                                                                                       |                 |
| 41 |                                 |     |                                                                                                                                                                                                                                                                                                                                       |                 |
| 42 |                                 |     |                                                                                                                                                                                                                                                                                                                                       |                 |
| 43 |                                 |     |                                                                                                                                                                                                                                                                                                                                       |                 |
| 44 |                                 |     |                                                                                                                                                                                                                                                                                                                                       |                 |
| 45 |                                 |     |                                                                                                                                                                                                                                                                                                                                       |                 |
| 46 |                                 |     |                                                                                                                                                                                                                                                                                                                                       |                 |
| 47 |                                 |     |                                                                                                                                                                                                                                                                                                                                       |                 |

|    |                               |     |                                                                                                                                                                                                                                                                                     |                |
|----|-------------------------------|-----|-------------------------------------------------------------------------------------------------------------------------------------------------------------------------------------------------------------------------------------------------------------------------------------|----------------|
| 1  | Consent or assent             | 26a | Who will obtain informed consent or assent from potential trial participants or authorised surrogates, and how (see Item 32)                                                                                                                                                        | _____ 11 _____ |
| 2  |                               |     |                                                                                                                                                                                                                                                                                     |                |
| 3  |                               |     |                                                                                                                                                                                                                                                                                     |                |
| 4  |                               | 26b | Additional consent provisions for collection and use of participant data and biological specimens in ancillary studies, if applicable                                                                                                                                               | _____ NA _____ |
| 5  |                               |     |                                                                                                                                                                                                                                                                                     |                |
| 6  |                               |     |                                                                                                                                                                                                                                                                                     |                |
| 7  | Confidentiality               | 27  | How personal information about potential and enrolled participants will be collected, shared, and maintained in order to protect confidentiality before, during, and after the trial                                                                                                | _____ 9 _____  |
| 8  |                               |     |                                                                                                                                                                                                                                                                                     |                |
| 9  |                               |     |                                                                                                                                                                                                                                                                                     |                |
| 10 | Declaration of interests      | 28  | Financial and other competing interests for principal investigators for the overall trial and each study site                                                                                                                                                                       | _____ 11 _____ |
| 11 |                               |     |                                                                                                                                                                                                                                                                                     |                |
| 12 |                               |     |                                                                                                                                                                                                                                                                                     |                |
| 13 |                               |     |                                                                                                                                                                                                                                                                                     |                |
| 14 | Access to data                | 29  | Statement of who will have access to the final trial dataset, and disclosure of contractual agreements that limit such access for investigators                                                                                                                                     | _____ 9 _____  |
| 15 |                               |     |                                                                                                                                                                                                                                                                                     |                |
| 16 |                               |     |                                                                                                                                                                                                                                                                                     |                |
| 17 | Ancillary and post-trial care | 30  | Provisions, if any, for ancillary and post-trial care, and for compensation to those who suffer harm from trial participation                                                                                                                                                       | _____ NA _____ |
| 18 |                               |     |                                                                                                                                                                                                                                                                                     |                |
| 19 |                               |     |                                                                                                                                                                                                                                                                                     |                |
| 20 | Dissemination policy          | 31a | Plans for investigators and sponsor to communicate trial results to participants, healthcare professionals, the public, and other relevant groups (eg, via publication, reporting in results databases, or other data sharing arrangements), including any publication restrictions | _____ 9 _____  |
| 21 |                               |     |                                                                                                                                                                                                                                                                                     |                |
| 22 |                               |     |                                                                                                                                                                                                                                                                                     |                |
| 23 |                               |     |                                                                                                                                                                                                                                                                                     |                |
| 24 |                               |     |                                                                                                                                                                                                                                                                                     |                |
| 25 |                               | 31b | Authorship eligibility guidelines and any intended use of professional writers                                                                                                                                                                                                      | _____ NA _____ |
| 26 |                               |     |                                                                                                                                                                                                                                                                                     |                |
| 27 |                               | 31c | Plans, if any, for granting public access to the full protocol, participant-level dataset, and statistical code                                                                                                                                                                     | _____ 9 _____  |
| 28 |                               |     |                                                                                                                                                                                                                                                                                     |                |
| 29 |                               |     |                                                                                                                                                                                                                                                                                     |                |
| 30 | <b>Appendices</b>             |     |                                                                                                                                                                                                                                                                                     |                |
| 31 |                               |     |                                                                                                                                                                                                                                                                                     |                |
| 32 | Informed consent materials    | 32  | Model consent form and other related documentation given to participants and authorised surrogates                                                                                                                                                                                  | _____ NA _____ |
| 33 |                               |     |                                                                                                                                                                                                                                                                                     |                |
| 34 |                               |     |                                                                                                                                                                                                                                                                                     |                |
| 35 | Biological specimens          | 33  | Plans for collection, laboratory evaluation, and storage of biological specimens for genetic or molecular analysis in the current trial and for future use in ancillary studies, if applicable                                                                                      | _____ NA _____ |
| 36 |                               |     |                                                                                                                                                                                                                                                                                     |                |
| 37 |                               |     |                                                                                                                                                                                                                                                                                     |                |

\*It is strongly recommended that this checklist be read in conjunction with the SPIRIT 2013 Explanation & Elaboration for important clarification on the items. Amendments to the protocol should be tracked and dated. The SPIRIT checklist is copyrighted by the SPIRIT Group under the Creative Commons "[Attribution-NonCommercial-NoDerivs 3.0 Unported](https://creativecommons.org/licenses/by-nc-nd/3.0/)" license.

# BMJ Open

## Effect of propofol combined with opioids on cough reflex suppression in gastroscopy: study protocol for a double-blind randomized controlled trial

|                                 |                                                                                                                                                                                                                                                                                                                                                                                                                                                                                                                                                                                                              |
|---------------------------------|--------------------------------------------------------------------------------------------------------------------------------------------------------------------------------------------------------------------------------------------------------------------------------------------------------------------------------------------------------------------------------------------------------------------------------------------------------------------------------------------------------------------------------------------------------------------------------------------------------------|
| Journal:                        | <i>BMJ Open</i>                                                                                                                                                                                                                                                                                                                                                                                                                                                                                                                                                                                              |
| Manuscript ID                   | bmjopen-2016-014881.R1                                                                                                                                                                                                                                                                                                                                                                                                                                                                                                                                                                                       |
| Article Type:                   | Protocol                                                                                                                                                                                                                                                                                                                                                                                                                                                                                                                                                                                                     |
| Date Submitted by the Author:   | 04-May-2017                                                                                                                                                                                                                                                                                                                                                                                                                                                                                                                                                                                                  |
| Complete List of Authors:       | Yin, Ning; Sir Run Run Hospital, Najing Medical University, Department of Anesthesiology<br>Xia, Jiangyan ; Zhongda Hospital, School of Medicine, Southeast University, Department of Anesthesiology<br>Cao, Yi-Zhi; Nanjing Medical University, School of Basic Medical Sciences<br>Lu, Xinjian ; Zhongda Hospital, School of Medicine, Southeast University, Department of Anesthesiology<br>Yuan, Jing ; Zhongda Hospital, School of Medicine, Southeast University, Department of Anesthesiology<br>Xie , Jue ; Zhongda Hospital, School of Medicine, Southeast University, Department of Anesthesiology |
| <b>Primary Subject Heading</b>: | Anaesthesia                                                                                                                                                                                                                                                                                                                                                                                                                                                                                                                                                                                                  |
| Secondary Subject Heading:      | Anaesthesia, Gastroenterology and hepatology                                                                                                                                                                                                                                                                                                                                                                                                                                                                                                                                                                 |
| Keywords:                       | sedation, propofol, opioids, Endoscopy < GASTROENTEROLOGY, cough                                                                                                                                                                                                                                                                                                                                                                                                                                                                                                                                             |
|                                 |                                                                                                                                                                                                                                                                                                                                                                                                                                                                                                                                                                                                              |

SCHOLARONE™  
Manuscripts

1  
2  
3  
4 **Effect of propofol combined with opioids on cough reflex suppression in**  
5  
6 **gastroscopy: study protocol for a double-blind randomized controlled trial**  
7  
8  
9

10  
11 Ning Yin<sup>1</sup>, Jiangyan Xia<sup>2</sup>, Yi-Zhi Cao<sup>3</sup>, Xinjian Lu<sup>2</sup>, Jing Yuan<sup>2</sup>, Jue Xie<sup>2</sup>  
12  
13

14  
15  
16 Department of Anesthesiology, Sir Run Run Hospital, Nanjing Medical University,  
17  
18 Nanjing 211166, China  
19

20  
21 Department of Anesthesiology, Zhongda Hospital, School of Medicine, Southeast  
22  
23 University, Nanjing 210009, China  
24

25  
26 School of Basic Medical Sciences, Nanjing Medical University, Nanjing 211166,  
27  
28 China  
29  
30

31  
32  
33  
34 **Corresponding author:**  
35

36 Ning Yin. Phone: +86-025-87115710; Email: dr.ningyin@tom.com; Address: 109  
37  
38 Longmian Avenue, Nanjing 210029, Jiangsu, China  
39  
40  
41  
42  
43  
44  
45  
46  
47  
48  
49  
50  
51  
52  
53  
54  
55  
56  
57  
58  
59  
60

## Abstract

**Introduction:** The best methods for analgesia and sedation for gastroscopy are still in debate and finding adequate regimen of sedation/analgesia is important. Stimulation of the larynx under sedation can cause reflex responses. Propofol with opioids has been recommended for gastroscopy sedation but their effects on cough reflex suppression remain unclear. This trial will evaluate the effects of propofol combined with small doses of dezocine, oxycodone, sufentanil, or fentanyl for gastroscopy. We hypothesize that combination of propofol and oxycodone may have better performance. We will observe the incidence and reflex degree of cough and gagging under sedation and will compare propofol combined with the above drugs to propofol alone and to each other, allowing a broad screen for feasible regimen.

**Methods and analysis:** This will be a prospective, randomized, double-blinded, controlled trial. Patients scheduled for gastroscopy, ASA I-II level, aged 18-65 years will be included. A total of 500 subjects are planned to be randomized to intravenously receive 2-2.2 mg/kg propofol plus 0.5-0.8 ug/kg fentanyl (fentanyl group), 2-2.2 mg/kg propofol plus 0.05-0.08 ug/kg sufentanil (sufentanil group), 2-2.2 mg/kg propofol plus 0.04-0.05 mg/kg dezocine (dezocine group), 2-2.2 mg/kg propofol plus 0.04-0.05 mg/kg oxycodone (oxycodone group), or 2.4-3 mg/kg propofol plus 2-2.5 ml saline (control group) for sedation. The primary endpoint is the incidence and reflex degree of cough and gagging. The secondary endpoints include occurrence of discomfort or side effects, whether jaw thrust, assistant ventilation, and additional propofol is used, recovery time, duration of procedure and Steward Score.

1  
2  
3  
4 **Ethics and dissemination:** This study has been approved by the Institutional Ethics  
5  
6 Committee for Clinical Research of Zhongda Hospital, Affiliated to Southeast  
7  
8 University (No. 2015ZDSYLL033.0). The results of the trial will be published in an  
9  
10 international peer-reviewed journal.  
11

12  
13  
14 **Trial registration:** This study was registered with the Chinese Clinical Trial Center  
15  
16 (No. ChiCTR-ICR-15006952).  
17

18  
19  
20  
21 **Keywords:** sedation, endoscopy, propofol, opioids, cough  
22

### 23 24 25 26 **Strengths and limitations of this study** 27

28 Double-blinded randomized placebo-controlled study design

29 Aiming to find adequate regimen of sedation and analgesia for gastroscopy

30  
31  
32 Evaluated the antitussive effects of a wide range of opioids  
33

34  
35  
36 Single-center study  
37  
38  
39  
40  
41  
42  
43  
44  
45  
46  
47  
48  
49  
50  
51  
52  
53  
54  
55  
56  
57  
58  
59  
60

## Introduction

Gastroscopy is an important and common endoscopic method of diagnosis and treatment of digestive diseases. However, during gastroscopy, patients' anxiety and discomfort such as throat irritation, cough, and nausea usually occur, which may affect the endoscopic operation, result in low examination quality, and consequently decrease the willingness of patients to undergo a repeated procedure. Pharyngeal anesthesia and sedation/anesthesia ranging from minimal sedation to general anesthesia have been used to relieve anxiety and discomfort, allowing a successful procedure [1-5].

Currently, endoscopic sedation has been widely applied in routine practice, with propofol sedation being endorsed [5-12]. Propofol is an intravenously administered sedative with a rapid onset and short duration of action [13]. Propofol has a favorable sedative effect and a wide range of inhibition effect on the central nervous system [14]. Propofol also strongly inhibits the contraction of gastrointestinal smooth muscles, antagonizes the vomiting reflex and reduce cough and body movement [5 15 16]. The incidences of postoperative headache, nausea and vomiting are low, and propofol even reduces nausea and vomiting [17]. Therefore, it has been widely used for sedation for gastroscopic procedures. Propofol is often used as a single agent. However, it has short duration of clinical effect, and inadequate sedation with propofol alone is seen, which requires additional doses. The duration of gastroscopy is relatively short, generally lasting for 10 minutes, but repeated addition of propofol can significantly prolong the recovery duration, increasing the risk of post-procedure

1  
2  
3  
4 respiratory depression and hypoxemia, and the workload of recovery management.

5  
6 Use of propofol in combination with opioids has been proposed to improve sedation  
7  
8 and analgesia regarding aspects such as recovery time, sedative effect, pain and other  
9  
10 discomfort [18-22].

11  
12  
13  
14 Cough is a defensive airway reflex. The epithelium cough receptors are sensitive to  
15  
16 both mechanical and chemical stimuli. Sedatives and analgesics have inhibitory effect  
17  
18 on airway reflex. However, propofol may still have chance to cause cough [23 24].

19  
20  
21 Moreover, stimulation of the larynx during propofol anesthesia can cause various  
22  
23 types of reflex responses [25]. Although opioids exert favorable analgesic and  
24  
25 sedative effects [20 26], and can inhibit pharyngeal reflex and stress response,  
26  
27 intravenous fentanyl and sufentanil-induced coughing is not uncommon [27 28]. The  
28  
29 induced cough, can be reduced by reduced by propofol [29] and interestingly, by  
30  
31 another opioid, dezocine [30]. Dezocine is an opioid analgesic acting on  $\mu$ -,  $\delta$ - and  
32  
33  $\kappa$ -opioid receptors and has been used in propofol sedation [31-33]. Oxycodone is an  
34  
35 opioid alkaloid acting on  $\mu$ - and  $\kappa$ -opioid receptors. It shows a good performance on  
36  
37 relieving visceral pain with small respiratory depression and is known to depress  
38  
39 cough reflex. Unlike fentanyl and sufentanil, dezocine and oxycodone have rarely  
40  
41 been studied in combination with propofol for gastroscopy.  
42  
43  
44  
45  
46  
47

48  
49 The best methods for analgesia and sedation for gastroscopy are still in debate and  
50  
51 finding adequate regimen of sedation/analgesia is important, which can influence the  
52  
53 quality of the examination, the patient's cooperation and the patient's and physician's  
54  
55 satisfaction with the sedation [5 16 34]. Based on our preliminary observation in  
56  
57  
58  
59  
60



1  
2  
3  
4 clinical practice, we hypothesize that combination of propofol and low-dose dezocine,  
5  
6 oxycodone or sufentanil for gastroscopy may decrease the incidence of cough and that  
7  
8 specifically, combination of propofol and oxycodone may have a better performance  
9  
10 than others.

11  
12  
13 In order to verify our hypothesis, we designed this clinical study, aiming to investigate  
14  
15 the effect of combination of propofol and opioids on cough reflex suppression in  
16  
17 gastroscopy.  
18  
19  
20  
21  
22

## 23 **Methods and analysis**

### 24 ***Study objective***

25  
26  
27 The primary objective of this study is to investigate the incidence and reflex degree of  
28  
29 cough and giggling under sedation with combination of propofol and fentanyl  
30  
31 sufentanil, dezocine, or oxycodone during gastroscopy. The secondary objective is to  
32  
33 assess effect of the combination regimens on sedative performance.  
34  
35  
36  
37

### 38 ***Study location***

39  
40  
41 A prospective, single-center, randomized, double-blinded, controlled trial will be  
42  
43 conducted in patients undergoing gastroscopy in the Affiliated Zhongda Hospital of  
44  
45 Southeast University, China.  
46  
47

### 48 ***Study population***

49  
50  
51 Participants will be recruited voluntarily according to the inclusion and exclusion  
52  
53 criteria below.  
54  
55

56  
57 Inclusion criteria:  
58  
59  
60

1  
2  
3  
4 Patients scheduled for gastroscopy, ASA I-II level, aged 18-65 years, willing to  
5  
6 participate after reading and sign an informed consent.  
7

8  
9 Exclusion criteria:

- 10  
11 1. Body mass index (BMI)  $\geq 30$  kg/m<sup>2</sup>,
- 12  
13 2. Patients with preoperative circulatory, respiratory or nervous system diseases,
- 14  
15 3. Preoperative hemoglobin level less than 70 g/L or albumin level less than 30 g/L
- 16  
17 4. Patients with sleep apnea syndrome.
- 18  
19 5. Patients with URI symptom.
- 20  
21 6. Patients with dry cough history.
- 22  
23 7. Patients with drug allergy.
- 24  
25  
26  
27

### 28 29 ***Randomization and blinding***

30  
31 Stratified randomization will be used to assign the candidate subjects to five groups  
32  
33 according to sex and BMI (two groups or three groups). Computer-generated random  
34  
35 group numbers will be printed and placed into different sealed envelope in turn. When  
36  
37 receiving a subject who met the inclusion criteria, the anesthesiologist determined the  
38  
39 grouping of the newly recruited subject according to different group numbers in the  
40  
41 envelopes. The regimen will be blind to both anesthesiologists and patients. The drugs  
42  
43 will be prepared by nurse anesthetists and labeled with numbers. Then the  
44  
45 anesthesiologist will inject the medication. The nurse anesthetists will be responsible  
46  
47 for recoding. The anesthesiologist will be notified the study group by the nurse  
48  
49 anesthetists in case of emergency.  
50  
51  
52  
53  
54

### 55 56 ***Current sample size justification***

57  
58  
59  
60

1  
2  
3  
4 A total of 500 subjects were planned to be involved. The subjects will be randomly  
5  
6 divided into 5 groups: dezocine group, fentanyl group, oxycodone group, sufentanil  
7  
8 and the control group, 100 cases in each group. The sample size was estimated  
9  
10 according to the chi-square test of the incidence of the primary categorical outcome,  
11  
12 incidence of cough (30%) within 5 min after endoscope insertion. The above total  
13  
14 number of observations makes it possible to detect small to moderate effective size  
15  
16 (approximately 0.20) with Type I error 5% and power of test 90%. The test of power  
17  
18 will remain 80% or higher when up to 20% of the subjects dropout from the study.  
19  
20  
21  
22

### 23 ***Statistical analysis***

24  
25 All data will be analyzed using SAS 9.3 or other statistical software packages as  
26  
27 needed. The statistical methods included descriptive statistics, t-test,  $\chi^2$  test, analysis  
28  
29 of variance, univariate unconditional logistic regression analysis, multivariate linear  
30  
31 regression analysis. A significance level is set at 5%.  
32  
33  
34  
35

### 36 ***Sedation***

37  
38 Patients will fast for twelve hours before gastroscopy. Dyclonine will be orally taken  
39  
40 10 minutes prior to sedation. The right upper extremity venous access will be  
41  
42 established before the patients enter the operation room. After entering the operation  
43  
44 room, the patients will lie in the left-lateral position, with the blood pressure cuff tied  
45  
46 to the left upper arm, and receive oxygen inhalation via nasal cannula (3-5 L/min).  
47  
48 After placement of bite block, blood pressure, heart rate, and SpO<sub>2</sub> will be measured  
49  
50 noninvasively (Philips MP50, Germany) to set up baselines and will be monitored  
51  
52 throughout the operation afterwards. Blood pressure will be measured at an interval of  
53  
54  
55  
56  
57  
58  
59  
60

1  
2  
3  
4 1 minute. Then patients will intravenously receive 2-2.2 mg/kg propofol (Fresenius  
5  
6 Kabi AB, Germany) plus 0.5-0.8 ug/kg fentanyl (Humanwell Pharmaceutical, China),  
7  
8 2-2.2 mg/kg propofol plus 0.05-0.08 ug/kg sufentanil (Humanwell Pharmaceutical,  
9  
10 China), 2-2.2 mg/kg propofol plus 0.04-0.05 mg/kg dezocine (Yangtze River  
11  
12 Pharmaceutical, China), 2-2.2 mg/kg propofol plus 0.04-0.05 mg/kg oxycodone  
13  
14 (Monti Pharmaceutical, China), or 2.4-3 mg/kg propofol plus 2-2.5 ml saline. All  
15  
16 drugs except Propofol will be diluted with saline. The doses of dezocine and  
17  
18 oxycodone are defined according to our preliminary study. The 2 ml of normal saline  
19  
20 is for subjects weighing  $\leq 70$  kg, and the 2.5 ml of normal saline is for subjects  
21  
22 weighing  $>70$  kg. Fentanyl will be diluted to 20 ug/ml, sufentanil to 2.5ug/ml,  
23  
24 dezocine and oxycodone each to 1 mg/ml. Drugs will be delivered by the Aespire  
25  
26 7900 anesthesia delivery system (GE Healthcare, USA). We will insert the probe  
27  
28 when BIS is 40-60. Jaw thrust will be done in case of respiratory depression and  
29  
30 oxygen desaturation. If jaw thrust is not working, assistant ventilation will be used.  
31  
32 For severe situation, tracheal intubation assisted respiration will performed. After  
33  
34 gastroscopy, all the patients will stay PACU. Patients will be followed up until  
35  
36 discharge of PACU.  
37  
38  
39  
40  
41  
42  
43  
44

#### 45 46 *Adverse events*

47  
48 All adverse events, such as nausea, vomiting, dyspnea, hypopnea, apnea, hypotension,  
49  
50 oxygen desaturation and bradycardia, will be recorded and closely monitored.  
51  
52 Medical strategy will be adjusted if necessary. Unexpected severe adverse events will  
53  
54 be reported to the ethics committee.  
55  
56  
57  
58  
59  
60

### ***Data collection and management***

Demographic variables and clinical data will be collected from all patients. Furthermore, during operation, blood pressure, heart rate, oxygen saturation, blood pressure will be monitored. The occurrence of swallowing, cough and giggling, body movement, adverse events, whether jaw thrust, assistant ventilation, and additional propofol is used and the duration of endoscopy will be recorded. Then, duration of calls for eyes open and the Steward score after eyes open will be recorded. All data will be collected throughout the study and will be securely managed in confidential conditions. Data will be recorded automatically by the vital signs monitor and anesthesia information system, and manually by a nurse anesthetist. The participants will be referred by the participant number rather than names, throughout the study unless otherwise specified. All relevant documents and files will be archived for five years. Data can be only accessed by the investigators who sign the confidential disclosure agreement and institutional or governmental auditors during the study. Data without patient identification will be publicly accessible after the study. The process will be monitored by the Institutional Ethics Committee (ICE) for Clinical Research of Zhongda Hospital.

### ***Endpoints***

The primary endpoint is the incidence and reflex degree of cough and giggling, which will be recorded within 5 min after endoscope insertion and throughout the procedure. The severity of cough is defined according to cough intensity and whether leading to failure of endoscope insertion. The secondary endpoints include (1) the occurrence of

1  
2  
3  
4 swallowing, body movement, and adverse events and whether jaw thrust, assistant  
5  
6 ventilation, and additional propofol is used, which will be recorded within five  
7  
8 minutes after endoscope insertion and throughout the procedure, and (2) duration of  
9  
10 calls for eyes open, the duration of procedure and Steward score [35] after eyes open.  
11  
12 Blood pressure, heart rate and SpO<sub>2</sub> will be monitored throughout the process.  
13  
14 "Patient satisfaction" is not included as a secondary outcome since patient can not  
15  
16 recall coughing or gagging.  
17  
18  
19

### 20 21 ***Protocol amendments*** 22

23  
24 Any changes of the protocol during the trial that may affect the conduct of the trial,  
25  
26 the safety and the benefit of the patients will require a formal amendment to the  
27  
28 protocol.  
29  
30  
31

### 32 33 **Discussion** 34

35  
36 It is important to improve analgesia and sedation for gastroscopy. Opioids, which  
37  
38 exert favorable analgesic, sedative effect and inhibit the stress response, are an  
39  
40 important part of surgical anesthesia. The combination of opioids and propofol is the  
41  
42 most commonly used regimen for general anesthesia. Currently, a small dose of  
43  
44 fentanyl combined with propofol in sedation for gastroscopy have been used in  
45  
46 clinical practice. However, fentanyl has the potential risks of respiratory depression,  
47  
48 choking and the stiffness of chest wall muscles. Clinical study on other opioids for  
49  
50 gastroscopy, such as oxycodone, dezocine and sufentanil, is inadequate. Finding an  
51  
52 adequate regimen is essential. Herein, we conduct this trial to evaluate the  
53  
54  
55  
56  
57  
58  
59  
60

1  
2  
3  
4 combination of small doses of dezocine, oxycodone or sufentanil for gastroscopy.  
5  
6 This study observes the incidence and reflex degree of cough under sedation. This  
7  
8 trial compares propofol combined the above drugs to propofol alone and to propofol  
9  
10 with fentanil, allowing a broad screen for feasible regimen. There are limitations of  
11  
12 this study. This is a single-center, which may limit the generalization of this study.  
13  
14 Future multiple-center large-sample size study will be needed. The result of this  
15  
16 clinical trial can confirm the favorable effects of combination of propofol with  
17  
18 small-dose opioids, and can contribute to finding satisfying regimens for sedation for  
19  
20 gastroscopy.  
21  
22  
23  
24  
25  
26  
27  
28

### 29 **Trial status**

30  
31 At the time of manuscript submission, the study is in the recruitment phase.  
32  
33  
34  
35

### 36 **Ethics and dissemination**

37  
38 This study has been approved by the Institutional Ethics Committee (ICE) for Clinical  
39  
40 Research of Zhongda Hospital, Affiliated to Southeast University (No.  
41  
42 2015ZDSYLL033.0) and is registered with the Chinese Clinical Trial Center  
43  
44 (ChiCTR-ICR-15006952). Only patients who give written informed consent will be  
45  
46 recruited. The results of the trial will be published in an international peer-reviewed  
47  
48 journal.  
49  
50  
51  
52  
53  
54

### 55 **Authors' contributions**

1  
2  
3  
4 NY conceived of the study. NY and JX participated in its design and coordination. NY,  
5  
6 JX, YZC, XL, JY and JX collected references and figured out the protocol. XL, YZC,  
7  
8 JY and JX performed statistics analysis. NY and JX drafted the manuscript. All  
9  
10 authors read and approved the final manuscript.  
11  
12  
13

### 14 15 16 **Funding**

17  
18 This research received no specific grant from any funding agency in the public,  
19  
20 commercial or not-for-profit sectors.  
21  
22  
23

### 24 25 26 **Competing interests**

27  
28 The authors declare that they have no competing interests. The committee mentioned  
29  
30 is independent from the sponsor and competing interests  
31  
32  
33  
34  
35  
36  
37  
38  
39  
40  
41  
42  
43  
44  
45  
46  
47  
48  
49  
50  
51  
52  
53  
54  
55  
56  
57  
58  
59  
60



## References

1. Standards of Practice Committee of the American Society for Gastrointestinal E, Lichtenstein DR, Jagannath S, et al. Sedation and anesthesia in GI endoscopy. *Gastrointest Endosc* 2008;**68**:815-26.
2. Soma Y, Saito H, Kishibe T, Takahashi T, Tanaka H, Munakata A. Evaluation of topical pharyngeal anesthesia for upper endoscopy including factors associated with patient tolerance. *Gastrointest Endosc* 2001;**53**:14-8.
3. Froehlich F, Schwizer W, Thorens J, Kohler M, Gonvers JJ, Fried M. Conscious sedation for gastroscopy: patient tolerance and cardiorespiratory parameters. *Gastroenterology* 1995;**108**:697-704.
4. Evans LT, Saberi S, Kim HM, Elta GH, Schoenfeld P. Pharyngeal anesthesia during sedated EGDs: is "the spray" beneficial? A meta-analysis and systematic review. *Gastrointest Endosc* 2006;**63**:761-6.
5. Triantafyllidis JK, Merikas E, Nikolakis D, Papalois AE. Sedation in gastrointestinal endoscopy: current issues. *World J Gastroenterol* 2013;**19**:463-81.
6. Porostocky P, Chiba N, Colacino P, Sadowski D, Singh H. A survey of sedation practices for colonoscopy in Canada. *Can J Gastroenterol* 2011;**25**:255-60.
7. Fanti L, Agostoni M, Gemma M, et al. Sedation and monitoring for gastrointestinal endoscopy: A nationwide web survey in Italy. *Dig Liver Dis* 2011;**43**:726-30.
8. Paspatis GA, Manolaraki MM, Tribonias G, et al. Endoscopic sedation in Greece: results from a nationwide survey for the Hellenic Foundation of

- 1  
2  
3 gastroenterology and nutrition. *Dig Liver Dis* 2009;**41**:807-11.  
4  
5  
6 9. Cohen LB, Wechsler JS, Gaetano JN, et al. Endoscopic sedation in the United States:  
7  
8 results from a nationwide survey. *Am J Gastroenterol* 2006;**101**:967-74.  
9  
10  
11 10. Riphhaus A, Rabofski M, Wehrmann T. Endoscopic sedation and monitoring  
12  
13 practice in Germany: results from the first nationwide survey. *Z*  
14  
15 *Gastroenterol* 2010;**48**:392-7.  
16  
17  
18 11. Baudet JS, Borque P, Borja E, et al. Use of sedation in gastrointestinal endoscopy:  
19  
20 a nationwide survey in Spain. *Eur J Gastroenterol Hepatol* 2009;**21**:882-8.  
21  
22  
23 12. Wehrmann T, Triantafyllou K. Propofol sedation in gastrointestinal endoscopy: a  
24  
25 gastroenterologist's perspective. *Digestion* 2010;**82**:106-9.  
26  
27  
28 13. Byrne MF, Chiba N, Singh H, Sadowski DC, Clinical Affairs Committee of the  
29  
30 Canadian Association of G. Propofol use for sedation during endoscopy in  
31  
32 adults: a Canadian Association of Gastroenterology position statement. *Can J*  
33  
34 *Gastroenterol* 2008;**22**:457-9.  
35  
36  
37 14. Inada T, Murao K, Shingu K, Yamada K, Nakao S, Nagata A. Effects of propofol  
38  
39 and thiopental on the central nervous system during nociceptive stimulation  
40  
41 in cats. *J Anesth* 2001;**15**:159-63.  
42  
43  
44 15. Lee TL, Ang SB, Dambisya YM, Adaikan GP, Lau LC. The effect of propofol on  
45  
46 human gastric and colonic muscle contractions. *Anesth Analg*  
47  
48 1999;**89**:1246-9.  
49  
50  
51 16. Fanti L, Testoni PA. Sedation and analgesia in gastrointestinal endoscopy: what's  
52  
53 new? *World J Gastroenterol* 2010;**16**:2451-7.  
54  
55  
56  
57  
58  
59  
60

- 1  
2  
3  
4 17. Cohen LB, Delegge MH, Aisenberg J, et al. AGA Institute review of endoscopic  
5  
6 sedation. *Gastroenterology* 2007;**133**:675-701.  
7
- 8  
9 18. Ho WM, Yen CM, Lan CH, et al. Comparison between the recovery time of  
10  
11 alfentanil and fentanyl in balanced propofol sedation for gastrointestinal and  
12  
13 colonoscopy: a prospective, randomized study. *BMC Gastroenterol*  
14  
15 2012;**12**:164.  
16
- 17  
18 19. Poulos JE, Kalogerinis PT, Caudle JN. Propofol compared with combination  
19  
20 propofol or midazolam/fentanyl for endoscopy in a community setting. *AANA*  
21  
22 *J* 2013;**81**:31-6.  
23
- 24  
25 20. Zhang L, Bao Y, Shi D. Comparing the pain of propofol via different  
26  
27 combinations of fentanyl, sufentanil or remifentanyl in gastrointestinal  
28  
29 endoscopy. *Acta Cir Bras* 2014;**29**:675-80.  
30  
31
- 32  
33 21. Xu ZY, Wang X, Si YY, et al. Intravenous remifentanyl and propofol for  
34  
35 gastroscopy. *J Clin Anesth* 2008;**20**:352-5.  
36  
37
- 38  
39 22. LaPierre CD, Johnson KB, Randall BR, Egan TD. A simulation study of common  
40  
41 propofol and propofol-opioid dosing regimens for upper endoscopy:  
42  
43 implications on the time course of recovery. *Anesthesiology*  
44  
45 2012;**117**:252-62.  
46  
47
- 48  
49 23. Yamamoto S, Motokawa K, Toyooka H. Propofol may cause coughing when used  
50  
51 as a sedative in patients undergoing orthopedic surgery under spinal  
52  
53 anesthesia. *Anesthesia & Analgesia* 1998;**86**:529S.  
54  
55
- 56  
57 24. Mitra S, Sinha PK, Anand LK, Gombar KK. Propofol-induced violent coughing.  
58  
59  
60

- 1  
2  
3  
4 *Anaesthesia* 2000;**55**:707-8.  
5  
6  
7 25. Tagaito Y, Isono S, Nishino T. Upper airway reflexes during a combination of  
8  
9 propofol and fentanyl anesthesia. *The Journal of the American Society of*  
10  
11 *Anesthesiologists* 1998;**88**:1459-66.  
12  
13  
14 26. Koshy G, Nair S, Norkus EP, Hertan HI, Pitchumoni CS. Propofol versus  
15  
16 midazolam and meperidine for conscious sedation in GI endoscopy. *Am J*  
17  
18 *Gastroenterol* 2000;**95**:1476-9.  
19  
20  
21 27. Yemen TA. Small doses of sufentanil will produce violent coughing in young  
22  
23 children. *Anesthesiology* 1998;**89**:271-2.  
24  
25  
26 28. Bohrer H, Fleischer F, Werning P. Tussive effect of a fentanyl bolus administered  
27  
28 through a central venous catheter. *Anaesthesia* 1990;**45**:18-21.  
29  
30  
31 29. Sedighinejad A, Naderi Nabi B, Haghghi M, et al. Propofol is Effective to  
32  
33 Depress Fentanyl-Induced Cough during Induction of Anesthesia. *Anesth*  
34  
35 *Pain Med* 2013;**2**:170-3.  
36  
37  
38 30. Liu XS, Xu GH, Shen QY, et al. Dezocine prevents sufentanil-induced cough  
39  
40 during general anesthesia induction: A randomized controlled trial.  
41  
42 *Pharmacol Rep* 2015;**67**:52-5.  
43  
44  
45  
46 31. Ramirez-Ruiz M, Smith I, White PF. Use of analgesics during propofol sedation: a  
47  
48 comparison of ketorolac, dezocine, and fentanyl. *J Clin Anesth* 1995;**7**:481-5.  
49  
50  
51 32. Lu Y, Ye Z, Wong GT, Dong C, Yu J. Prevention of injection pain due to propofol  
52  
53 by dezocine: a comparison with lidocaine. *Indian J Pharmacol*  
54  
55 2013;**45**:619-21.  
56  
57  
58  
59  
60

- 1  
2  
3  
4 33. Zheng M, Guo Y, Shan S, Yang S. Dezocine for anesthesia and stress reduction in  
5  
6 induced abortion. *Patient Prefer Adherence* 2015;**9**:369-72.  
7  
8  
9 34. Bell GD. Preparation, premedication, and surveillance. *Endoscopy* 2004;**36**:23-31.  
10  
11 35. Steward DJ. A simplified scoring system for the post-operative recovery room.  
12  
13 *Can Anaesth Soc J* 1975;**22**:111-3.  
14  
15  
16  
17  
18  
19  
20  
21  
22  
23  
24  
25  
26  
27  
28  
29  
30  
31  
32  
33  
34  
35  
36  
37  
38  
39  
40  
41  
42  
43  
44  
45  
46  
47  
48  
49  
50  
51  
52  
53  
54  
55  
56  
57  
58  
59  
60

1  
2  
3  
4  
5  
6  
7  
8  
9  
10  
11  
12  
13  
14  
15  
16  
17  
18  
19  
20  
21  
22  
23  
24  
25  
26  
27  
28  
29  
30  
31  
32  
33  
34  
35  
36  
37  
38  
39  
40  
41  
42  
43  
44  
45  
46  
47  
48  
49  
50  
51  
52  
53  
54  
55  
56  
57  
58  
59  
60

**Figure Legend**

Figure 1. Follow chart of the study.

For peer review only

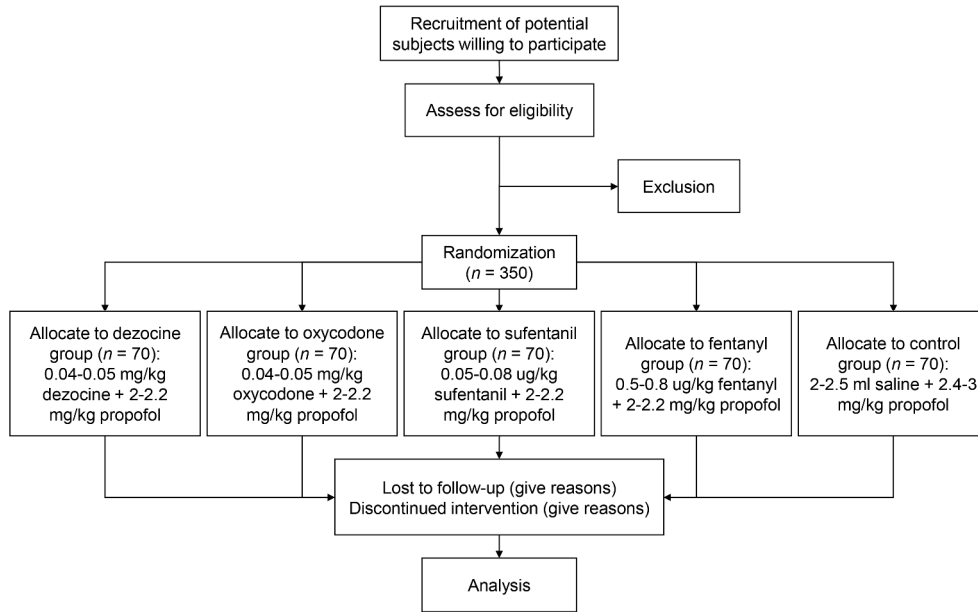

Follow chart of the study.

292x182mm (300 x 300 DPI)

Review only

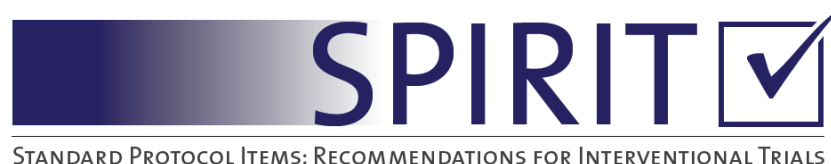

STANDARD PROTOCOL ITEMS: RECOMMENDATIONS FOR INTERVENTIONAL TRIALS

SPIRIT 2013 Checklist: Recommended items to address in a clinical trial protocol and related documents\*

| Section/item                      | Item No | Description                                                                                                                                                                                                                                                                              | Addressed on page number |
|-----------------------------------|---------|------------------------------------------------------------------------------------------------------------------------------------------------------------------------------------------------------------------------------------------------------------------------------------------|--------------------------|
| <b>Administrative information</b> |         |                                                                                                                                                                                                                                                                                          |                          |
| Title                             | 1       | Descriptive title identifying the study design, population, interventions, and, if applicable, trial acronym                                                                                                                                                                             | ___ 1 ___                |
| Trial registration                | 2a      | Trial identifier and registry name. If not yet registered, name of intended registry                                                                                                                                                                                                     | ___ 3 ___                |
|                                   | 2b      | All items from the World Health Organization Trial Registration Data Set                                                                                                                                                                                                                 | ___ NA ___               |
| Protocol version                  | 3       | Date and version identifier                                                                                                                                                                                                                                                              | ___ 10 ___               |
| Funding                           | 4       | Sources and types of financial, material, and other support                                                                                                                                                                                                                              | ___ NA ___               |
| Roles and responsibilities        | 5a      | Names, affiliations, and roles of protocol contributors                                                                                                                                                                                                                                  | ___ 1 ___                |
|                                   | 5b      | Name and contact information for the trial sponsor                                                                                                                                                                                                                                       | ___ NA ___               |
|                                   | 5c      | Role of study sponsor and funders, if any, in study design; collection, management, analysis, and interpretation of data; writing of the report; and the decision to submit the report for publication, including whether they will have ultimate authority over any of these activities | ___ NA ___               |
|                                   | 5d      | Composition, roles, and responsibilities of the coordinating centre, steering committee, endpoint adjudication committee, data management team, and other individuals or groups overseeing the trial, if applicable (see Item 21a for data monitoring committee)                         | ___ 9, 11 ___            |



1 **Introduction**

2

3 Background and 6a Description of research question and justification for undertaking the trial, including summary of relevant \_\_\_\_\_ 4-5 \_\_\_\_\_

4 rationale studies (published and unpublished) examining benefits and harms for each intervention

5

6 6b Explanation for choice of comparators \_\_\_\_\_ 5 \_\_\_\_\_

7

8 Objectives 7 Specific objectives or hypotheses \_\_\_\_\_ 5-6 \_\_\_\_\_

9

10 Trial design 8 Description of trial design including type of trial (eg, parallel group, crossover, factorial, single group), \_\_\_\_\_

11 allocation ratio, and framework (eg, superiority, equivalence, noninferiority, exploratory) \_\_\_\_\_ 6 \_\_\_\_\_

12

13

14

15 **Methods: Participants, interventions, and outcomes**

16

17 Study setting 9 Description of study settings (eg, community clinic, academic hospital) and list of countries where data will \_\_\_\_\_ 6 \_\_\_\_\_

18 be collected. Reference to where list of study sites can be obtained

19

20 Eligibility criteria 10 Inclusion and exclusion criteria for participants. If applicable, eligibility criteria for study centres and \_\_\_\_\_ 6 \_\_\_\_\_

21 individuals who will perform the interventions (eg, surgeons, psychotherapists)

22

23 Interventions 11a Interventions for each group with sufficient detail to allow replication, including how and when they will be \_\_\_\_\_ 8 \_\_\_\_\_

24 administered

25

26 11b Criteria for discontinuing or modifying allocated interventions for a given trial participant (eg, drug dose \_\_\_\_\_ 9 \_\_\_\_\_

27 change in response to harms, participant request, or improving/worsening disease)

28

29 11c Strategies to improve adherence to intervention protocols, and any procedures for monitoring adherence \_\_\_\_\_ 8 \_\_\_\_\_

30 (eg, drug tablet return, laboratory tests)

31

32 11d Relevant concomitant care and interventions that are permitted or prohibited during the trial \_\_\_\_\_ NA \_\_\_\_\_

33

34 Outcomes 12 Primary, secondary, and other outcomes, including the specific measurement variable (eg, systolic blood \_\_\_\_\_ 9 \_\_\_\_\_

35 pressure), analysis metric (eg, change from baseline, final value, time to event), method of aggregation (eg, \_\_\_\_\_

36 median, proportion), and time point for each outcome. Explanation of the clinical relevance of chosen \_\_\_\_\_

37 efficacy and harm outcomes is strongly recommended

38

39

40

41 Participant timeline 13 Time schedule of enrolment, interventions (including any run-ins and washouts), assessments, and visits for \_\_\_\_\_ Figure 1

42 participants. A schematic diagram is highly recommended (see Figure)

43

44

45

46

47

1 Sample size 14 Estimated number of participants needed to achieve study objectives and how it was determined, including \_\_\_\_\_7\_\_\_\_\_  
 2 clinical and statistical assumptions supporting any sample size calculations

3  
 4 Recruitment 15 Strategies for achieving adequate participant enrolment to reach target sample size \_\_\_\_\_6\_\_\_\_\_  
 5  
 6

### 7 **Methods: Assignment of interventions (for controlled trials)**

#### 8 Allocation:

9  
 10  
 11 Sequence 16a Method of generating the allocation sequence (eg, computer-generated random numbers), and list of any \_\_\_\_\_7\_\_\_\_\_  
 12 generation factors for stratification. To reduce predictability of a random sequence, details of any planned restriction  
 13 (eg, blocking) should be provided in a separate document that is unavailable to those who enrol participants  
 14 or assign interventions

15  
 16  
 17 Allocation 16b Mechanism of implementing the allocation sequence (eg, central telephone; sequentially numbered, \_\_\_\_\_7\_\_\_\_\_  
 18 concealment opaque, sealed envelopes), describing any steps to conceal the sequence until interventions are assigned  
 19 mechanism

20  
 21 Implementation 16c Who will generate the allocation sequence, who will enrol participants, and who will assign participants to \_\_\_\_\_7\_\_\_\_\_  
 22 interventions

23  
 24 Blinding (masking) 17a Who will be blinded after assignment to interventions (eg, trial participants, care providers, outcome \_\_\_\_\_7\_\_\_\_\_  
 25 assessors, data analysts), and how

26  
 27  
 28 17b If blinded, circumstances under which unblinding is permissible, and procedure for revealing a participant's \_\_\_\_\_NA\_\_\_\_\_  
 29 allocated intervention during the trial

### 30 31 32 **Methods: Data collection, management, and analysis**

33  
 34 Data collection 18a Plans for assessment and collection of outcome, baseline, and other trial data, including any related \_\_\_\_\_9\_\_\_\_\_  
 35 methods processes to promote data quality (eg, duplicate measurements, training of assessors) and a description of  
 36 study instruments (eg, questionnaires, laboratory tests) along with their reliability and validity, if known.  
 37 Reference to where data collection forms can be found, if not in the protocol

38  
 39  
 40 18b Plans to promote participant retention and complete follow-up, including list of any outcome data to be \_\_\_\_\_9\_\_\_\_\_  
 41 collected for participants who discontinue or deviate from intervention protocols

|    |                                 |     |                                                                                                                                                                                                                                                                                                                                       |                 |
|----|---------------------------------|-----|---------------------------------------------------------------------------------------------------------------------------------------------------------------------------------------------------------------------------------------------------------------------------------------------------------------------------------------|-----------------|
| 1  | Data management                 | 19  | Plans for data entry, coding, security, and storage, including any related processes to promote data quality (eg, double data entry; range checks for data values). Reference to where details of data management procedures can be found, if not in the protocol                                                                     | _____9_____     |
| 2  |                                 |     |                                                                                                                                                                                                                                                                                                                                       |                 |
| 3  |                                 |     |                                                                                                                                                                                                                                                                                                                                       |                 |
| 4  |                                 |     |                                                                                                                                                                                                                                                                                                                                       |                 |
| 5  | Statistical methods             | 20a | Statistical methods for analysing primary and secondary outcomes. Reference to where other details of the statistical analysis plan can be found, if not in the protocol                                                                                                                                                              | _____8_____     |
| 6  |                                 |     |                                                                                                                                                                                                                                                                                                                                       |                 |
| 7  |                                 |     |                                                                                                                                                                                                                                                                                                                                       |                 |
| 8  |                                 | 20b | Methods for any additional analyses (eg, subgroup and adjusted analyses)                                                                                                                                                                                                                                                              | _____NA_____    |
| 9  |                                 |     |                                                                                                                                                                                                                                                                                                                                       |                 |
| 10 |                                 | 20c | Definition of analysis population relating to protocol non-adherence (eg, as randomised analysis), and any statistical methods to handle missing data (eg, multiple imputation)                                                                                                                                                       | _____8_____     |
| 11 |                                 |     |                                                                                                                                                                                                                                                                                                                                       |                 |
| 12 |                                 |     |                                                                                                                                                                                                                                                                                                                                       |                 |
| 13 |                                 |     |                                                                                                                                                                                                                                                                                                                                       |                 |
| 14 |                                 |     |                                                                                                                                                                                                                                                                                                                                       |                 |
| 15 | <b>Methods: Monitoring</b>      |     |                                                                                                                                                                                                                                                                                                                                       |                 |
| 16 |                                 |     |                                                                                                                                                                                                                                                                                                                                       |                 |
| 17 | Data monitoring                 | 21a | Composition of data monitoring committee (DMC); summary of its role and reporting structure; statement of whether it is independent from the sponsor and competing interests; and reference to where further details about its charter can be found, if not in the protocol. Alternatively, an explanation of why a DMC is not needed | _____9, 11_____ |
| 18 |                                 |     |                                                                                                                                                                                                                                                                                                                                       |                 |
| 19 |                                 |     |                                                                                                                                                                                                                                                                                                                                       |                 |
| 20 |                                 |     |                                                                                                                                                                                                                                                                                                                                       |                 |
| 21 |                                 |     |                                                                                                                                                                                                                                                                                                                                       |                 |
| 22 |                                 | 21b | Description of any interim analyses and stopping guidelines, including who will have access to these interim results and make the final decision to terminate the trial                                                                                                                                                               | _____9_____     |
| 23 |                                 |     |                                                                                                                                                                                                                                                                                                                                       |                 |
| 24 |                                 |     |                                                                                                                                                                                                                                                                                                                                       |                 |
| 25 |                                 |     |                                                                                                                                                                                                                                                                                                                                       |                 |
| 26 | Harms                           | 22  | Plans for collecting, assessing, reporting, and managing solicited and spontaneously reported adverse events and other unintended effects of trial interventions or trial conduct                                                                                                                                                     | _____9_____     |
| 27 |                                 |     |                                                                                                                                                                                                                                                                                                                                       |                 |
| 28 |                                 |     |                                                                                                                                                                                                                                                                                                                                       |                 |
| 29 | Auditing                        | 23  | Frequency and procedures for auditing trial conduct, if any, and whether the process will be independent from investigators and the sponsor                                                                                                                                                                                           | _____9_____     |
| 30 |                                 |     |                                                                                                                                                                                                                                                                                                                                       |                 |
| 31 |                                 |     |                                                                                                                                                                                                                                                                                                                                       |                 |
| 32 |                                 |     |                                                                                                                                                                                                                                                                                                                                       |                 |
| 33 | <b>Ethics and dissemination</b> |     |                                                                                                                                                                                                                                                                                                                                       |                 |
| 34 |                                 |     |                                                                                                                                                                                                                                                                                                                                       |                 |
| 35 | Research ethics approval        | 24  | Plans for seeking research ethics committee/institutional review board (REC/IRB) approval                                                                                                                                                                                                                                             | _____11_____    |
| 36 |                                 |     |                                                                                                                                                                                                                                                                                                                                       |                 |
| 37 |                                 |     |                                                                                                                                                                                                                                                                                                                                       |                 |
| 38 | Protocol amendments             | 25  | Plans for communicating important protocol modifications (eg, changes to eligibility criteria, outcomes, analyses) to relevant parties (eg, investigators, REC/IRBs, trial participants, trial registries, journals, regulators)                                                                                                      | _____10_____    |
| 39 |                                 |     |                                                                                                                                                                                                                                                                                                                                       |                 |
| 40 |                                 |     |                                                                                                                                                                                                                                                                                                                                       |                 |
| 41 |                                 |     |                                                                                                                                                                                                                                                                                                                                       |                 |
| 42 |                                 |     |                                                                                                                                                                                                                                                                                                                                       |                 |
| 43 |                                 |     |                                                                                                                                                                                                                                                                                                                                       |                 |
| 44 |                                 |     |                                                                                                                                                                                                                                                                                                                                       |                 |
| 45 |                                 |     |                                                                                                                                                                                                                                                                                                                                       |                 |
| 46 |                                 |     |                                                                                                                                                                                                                                                                                                                                       |                 |
| 47 |                                 |     |                                                                                                                                                                                                                                                                                                                                       |                 |

|    |                               |     |                                                                                                                                                                                                                                                                                     |                |
|----|-------------------------------|-----|-------------------------------------------------------------------------------------------------------------------------------------------------------------------------------------------------------------------------------------------------------------------------------------|----------------|
| 1  | Consent or assent             | 26a | Who will obtain informed consent or assent from potential trial participants or authorised surrogates, and how (see Item 32)                                                                                                                                                        | _____ 11 _____ |
| 2  |                               |     |                                                                                                                                                                                                                                                                                     |                |
| 3  |                               |     |                                                                                                                                                                                                                                                                                     |                |
| 4  |                               | 26b | Additional consent provisions for collection and use of participant data and biological specimens in ancillary studies, if applicable                                                                                                                                               | _____ NA _____ |
| 5  |                               |     |                                                                                                                                                                                                                                                                                     |                |
| 6  |                               |     |                                                                                                                                                                                                                                                                                     |                |
| 7  | Confidentiality               | 27  | How personal information about potential and enrolled participants will be collected, shared, and maintained in order to protect confidentiality before, during, and after the trial                                                                                                | _____ 9 _____  |
| 8  |                               |     |                                                                                                                                                                                                                                                                                     |                |
| 9  |                               |     |                                                                                                                                                                                                                                                                                     |                |
| 10 | Declaration of interests      | 28  | Financial and other competing interests for principal investigators for the overall trial and each study site                                                                                                                                                                       | _____ 11 _____ |
| 11 |                               |     |                                                                                                                                                                                                                                                                                     |                |
| 12 |                               |     |                                                                                                                                                                                                                                                                                     |                |
| 13 |                               |     |                                                                                                                                                                                                                                                                                     |                |
| 14 | Access to data                | 29  | Statement of who will have access to the final trial dataset, and disclosure of contractual agreements that limit such access for investigators                                                                                                                                     | _____ 9 _____  |
| 15 |                               |     |                                                                                                                                                                                                                                                                                     |                |
| 16 |                               |     |                                                                                                                                                                                                                                                                                     |                |
| 17 | Ancillary and post-trial care | 30  | Provisions, if any, for ancillary and post-trial care, and for compensation to those who suffer harm from trial participation                                                                                                                                                       | _____ NA _____ |
| 18 |                               |     |                                                                                                                                                                                                                                                                                     |                |
| 19 |                               |     |                                                                                                                                                                                                                                                                                     |                |
| 20 | Dissemination policy          | 31a | Plans for investigators and sponsor to communicate trial results to participants, healthcare professionals, the public, and other relevant groups (eg, via publication, reporting in results databases, or other data sharing arrangements), including any publication restrictions | _____ 9 _____  |
| 21 |                               |     |                                                                                                                                                                                                                                                                                     |                |
| 22 |                               |     |                                                                                                                                                                                                                                                                                     |                |
| 23 |                               |     |                                                                                                                                                                                                                                                                                     |                |
| 24 |                               |     |                                                                                                                                                                                                                                                                                     |                |
| 25 |                               | 31b | Authorship eligibility guidelines and any intended use of professional writers                                                                                                                                                                                                      | _____ NA _____ |
| 26 |                               |     |                                                                                                                                                                                                                                                                                     |                |
| 27 |                               | 31c | Plans, if any, for granting public access to the full protocol, participant-level dataset, and statistical code                                                                                                                                                                     | _____ 9 _____  |
| 28 |                               |     |                                                                                                                                                                                                                                                                                     |                |
| 29 |                               |     |                                                                                                                                                                                                                                                                                     |                |
| 30 | <b>Appendices</b>             |     |                                                                                                                                                                                                                                                                                     |                |
| 31 |                               |     |                                                                                                                                                                                                                                                                                     |                |
| 32 | Informed consent materials    | 32  | Model consent form and other related documentation given to participants and authorised surrogates                                                                                                                                                                                  | _____ NA _____ |
| 33 |                               |     |                                                                                                                                                                                                                                                                                     |                |
| 34 |                               |     |                                                                                                                                                                                                                                                                                     |                |
| 35 | Biological specimens          | 33  | Plans for collection, laboratory evaluation, and storage of biological specimens for genetic or molecular analysis in the current trial and for future use in ancillary studies, if applicable                                                                                      | _____ NA _____ |
| 36 |                               |     |                                                                                                                                                                                                                                                                                     |                |
| 37 |                               |     |                                                                                                                                                                                                                                                                                     |                |

38  
39 \*It is strongly recommended that this checklist be read in conjunction with the SPIRIT 2013 Explanation & Elaboration for important clarification on the items.  
40 Amendments to the protocol should be tracked and dated. The SPIRIT checklist is copyrighted by the SPIRIT Group under the Creative Commons  
41 "[Attribution-NonCommercial-NoDerivs 3.0 Unported](https://creativecommons.org/licenses/by-nc-nd/3.0/)" license.  
42  
43  
44

# BMJ Open

## Effect of propofol combined with opioids on cough reflex suppression in gastroscopy: study protocol for a double-blind randomized controlled trial

|                                 |                                                                                                                                                                                                                                                                                                                                                                                                                                                                                                                                                                                                              |
|---------------------------------|--------------------------------------------------------------------------------------------------------------------------------------------------------------------------------------------------------------------------------------------------------------------------------------------------------------------------------------------------------------------------------------------------------------------------------------------------------------------------------------------------------------------------------------------------------------------------------------------------------------|
| Journal:                        | <i>BMJ Open</i>                                                                                                                                                                                                                                                                                                                                                                                                                                                                                                                                                                                              |
| Manuscript ID                   | bmjopen-2016-014881.R2                                                                                                                                                                                                                                                                                                                                                                                                                                                                                                                                                                                       |
| Article Type:                   | Protocol                                                                                                                                                                                                                                                                                                                                                                                                                                                                                                                                                                                                     |
| Date Submitted by the Author:   | 14-Jun-2017                                                                                                                                                                                                                                                                                                                                                                                                                                                                                                                                                                                                  |
| Complete List of Authors:       | Yin, Ning; Sir Run Run Hospital, Najing Medical University, Department of Anesthesiology<br>Xia, Jiangyan ; Zhongda Hospital, School of Medicine, Southeast University, Department of Anesthesiology<br>Cao, Yi-Zhi; Nanjing Medical University, School of Basic Medical Sciences<br>Lu, Xinjian ; Zhongda Hospital, School of Medicine, Southeast University, Department of Anesthesiology<br>Yuan, Jing ; Zhongda Hospital, School of Medicine, Southeast University, Department of Anesthesiology<br>Xie , Jue ; Zhongda Hospital, School of Medicine, Southeast University, Department of Anesthesiology |
| <b>Primary Subject Heading</b>: | Anaesthesia                                                                                                                                                                                                                                                                                                                                                                                                                                                                                                                                                                                                  |
| Secondary Subject Heading:      | Anaesthesia, Gastroenterology and hepatology                                                                                                                                                                                                                                                                                                                                                                                                                                                                                                                                                                 |
| Keywords:                       | sedation, propofol, opioids, Endoscopy < GASTROENTEROLOGY, cough                                                                                                                                                                                                                                                                                                                                                                                                                                                                                                                                             |
|                                 |                                                                                                                                                                                                                                                                                                                                                                                                                                                                                                                                                                                                              |

SCHOLARONE™  
Manuscripts

1  
2  
3  
4 **Effect of propofol combined with opioids on cough reflex suppression in**  
5  
6 **gastroscopy: study protocol for a double-blind randomized controlled trial**  
7  
8  
9

10  
11 Ning Yin<sup>1</sup>, Jiangyan Xia<sup>2</sup>, Yi-Zhi Cao<sup>3</sup>, Xinjian Lu<sup>2</sup>, Jing Yuan<sup>2</sup>, Jue Xie<sup>2</sup>  
12  
13

14  
15  
16 Department of Anesthesiology, Sir Run Run Hospital, Nanjing Medical University,  
17  
18 Nanjing 211166, China  
19

20  
21 Department of Anesthesiology, Zhongda Hospital, School of Medicine, Southeast  
22  
23 University, Nanjing 210009, China  
24

25  
26 School of Basic Medical Sciences, Nanjing Medical University, Nanjing 211166,  
27  
28 China  
29  
30

31  
32  
33  
34 **Corresponding author:**  
35

36 Ning Yin. Phone: +86-025-87115710; Email: dr.ningyin@tom.com; Address: 109  
37  
38 Longmian Avenue, Nanjing 210029, Jiangsu, China  
39  
40  
41  
42  
43  
44  
45  
46  
47  
48  
49  
50  
51  
52  
53  
54  
55  
56  
57  
58  
59  
60

## Abstract

**Introduction:** The best methods for analgesia and sedation for gastroscopy are still in debate and finding adequate regimen of sedation/analgesia is important. Stimulation of the larynx under sedation can cause reflex responses. Propofol with opioids has been recommended for gastroscopy sedation but their effects on cough reflex suppression remain unclear. This trial will evaluate the effects of propofol combined with small doses of dezocine, oxycodone, sufentanil, or fentanyl for gastroscopy. We hypothesize that combination of propofol and oxycodone may have better performance. We will observe the incidence and reflex degree of cough and gagging under sedation and will compare propofol combined with the above drugs to propofol alone and to each other, allowing a broad screen for feasible regimen.

**Methods and analysis:** This will be a prospective, randomized, double-blinded, controlled trial. Patients scheduled for gastroscopy, ASA I-II level, aged 18-65 years will be included. A total of 500 subjects are planned to be randomized to intravenously receive 2-2.2 mg/kg propofol plus 0.5-0.8 ug/kg fentanyl (fentanyl group), 2-2.2 mg/kg propofol plus 0.05-0.08 ug/kg sufentanil (sufentanil group), 2-2.2 mg/kg propofol plus 0.04-0.05 mg/kg dezocine (dezocine group), 2-2.2 mg/kg propofol plus 0.04-0.05 mg/kg oxycodone (oxycodone group), or 2.4-3 mg/kg propofol plus 2-2.5 ml saline (control group) for sedation. The primary endpoint is the incidence and reflex degree of cough and gagging. The secondary endpoints include occurrence of discomfort or side effects, whether jaw thrust, assistant ventilation, and additional propofol is used, recovery time, duration of procedure and Steward Score.

1  
2  
3  
4 **Ethics and dissemination:** This study has been approved by the Institutional Ethics  
5  
6 Committee for Clinical Research of Zhongda Hospital, Affiliated to Southeast  
7  
8 University (No. 2015ZDSYLL033.0). The results of the trial will be published in an  
9  
10 international peer-reviewed journal.  
11

12  
13  
14 **Trial registration:** This study was registered with the Chinese Clinical Trial Center  
15  
16 (No. ChiCTR-ICR-15006952).  
17

18  
19  
20  
21 **Keywords:** sedation, endoscopy, propofol, opioids, cough  
22

### 23 24 25 26 **Strengths and limitations of this study** 27

28 This is a double-blinded randomized placebo-controlled study design

29 This study aims to find adequate regimen of sedation and analgesia for gastroscopy

30 This study will evaluate the antitussive effects of a wide range of opioids

31 The dose of propofol for this study is still high.

32 This is a single-center study.  
33  
34  
35  
36  
37  
38  
39  
40  
41  
42  
43  
44  
45  
46  
47  
48  
49  
50  
51  
52  
53  
54  
55  
56  
57  
58  
59  
60



## Introduction

Gastroscopy is an important and common endoscopic method of diagnosis and treatment of digestive diseases. However, during gastroscopy, patients' anxiety and discomfort such as throat irritation, cough, and nausea usually occur, which may affect the endoscopic operation, result in low examination quality, and consequently decrease the willingness of patients to undergo a repeated procedure. Pharyngeal anesthesia and sedation/anesthesia ranging from minimal sedation to general anesthesia have been used to relieve anxiety and discomfort, allowing a successful procedure [1-5].

Currently, endoscopic sedation has been widely applied in routine practice, with propofol sedation being endorsed [5-12]. Propofol is an intravenously administered sedative with a rapid onset and short duration of action [13]. Propofol has a favorable sedative effect and a wide range of inhibition effect on the central nervous system [14]. Propofol also strongly inhibits the contraction of gastrointestinal smooth muscles, antagonizes the vomiting reflex and reduce cough and body movement [5 15 16]. The incidences of postoperative headache, nausea and vomiting are low, and propofol even reduces nausea and vomiting [17]. Therefore, it has been widely used for sedation for gastroscopic procedures. Propofol is often used as a single agent. However, it has short duration of clinical effect, and inadequate sedation with propofol alone is seen, which requires additional doses. The duration of gastroscopy is relatively short, generally lasting for 10 minutes, but repeated addition of propofol can significantly prolong the recovery duration, increasing the risk of post-procedure

1  
2  
3  
4 respiratory depression and hypoxemia, and the workload of recovery management.

5  
6 Use of propofol in combination with opioids has been proposed to improve sedation  
7  
8 and analgesia regarding aspects such as recovery time, sedative effect, pain and other  
9  
10 discomfort [18-22].

11  
12  
13  
14 Cough is a defensive airway reflex. The epithelium cough receptors are sensitive to  
15  
16 both mechanical and chemical stimuli. Sedatives and analgesics have inhibitory effect  
17  
18 on airway reflex. However, propofol may still have chance to cause cough [23 24].

19  
20  
21 Moreover, stimulation of the larynx during propofol anesthesia can cause various  
22  
23 types of reflex responses [25]. Although opioids exert favorable analgesic and  
24  
25 sedative effects [20 26], and can inhibit pharyngeal reflex and stress response,  
26  
27 intravenous fentanyl and sufentanil-induced coughing is not uncommon [27 28]. The  
28  
29 induced cough, can be reduced by propofol [29] and interestingly, by another opioid,  
30  
31 dezocine [30]. Dezocine is an opioid analgesic acting on  $\mu$ -,  $\delta$ - and  $\kappa$ -opioid receptors  
32  
33 and has been used in propofol sedation [31-33]. Oxycodone is an opioid alkaloid  
34  
35 acting on  $\mu$ - and  $\kappa$ -opioid receptors. It shows a good performance on relieving visceral  
36  
37 pain with small respiratory depression and is known to depress cough reflex. Unlike  
38  
39 fentanyl and sufentanil, dezocine and oxycodone have rarely been studied in  
40  
41 combination with propofol for gastroscopy.  
42  
43  
44  
45  
46  
47

48  
49 The best methods for analgesia and sedation for gastroscopy are still in debate and  
50  
51 finding adequate regimen of sedation/analgesia is important, which can influence the  
52  
53 quality of the examination, the patient's cooperation and the patient's and physician's  
54  
55 satisfaction with the sedation [5 16 34]. Based on our preliminary observation in  
56  
57  
58  
59  
60

1  
2  
3  
4 clinical practice, we hypothesize that combination of propofol and low-dose dezocine,  
5  
6  
7  
8  
9  
10  
11  
12  
13  
14  
15  
16  
17  
18  
19  
20  
21  
22  
23  
24  
25  
26  
27  
28  
29  
30  
31  
32  
33  
34  
35  
36  
37  
38  
39  
40  
41  
42  
43  
44  
45  
46  
47  
48  
49  
50  
51  
52  
53  
54  
55  
56  
57  
58  
59  
60

clinical practice, we hypothesize that combination of propofol and low-dose dezocine, oxycodone or sufentanil for gastroscopy may decrease the incidence of cough and that specifically, combination of propofol and oxycodone may have a better performance than others.

In order to verify our hypothesis, we designed this clinical study, aiming to investigate the effect of combination of propofol and opioids on cough reflex suppression in gastroscopy.

## Methods and analysis

### *Study objective*

The primary objective of this study is to investigate the incidence and reflex degree of cough and giggling under sedation with combination of propofol and fentanyl, sufentanil, dezocine, or oxycodone during gastroscopy. The secondary objective is to assess effect of the combination regimens on sedative performance.

### *Study location*

A prospective, single-center, randomized, double-blinded, controlled trial will be conducted in patients undergoing gastroscopy in the Affiliated Zhongda Hospital of Southeast University, China.

### *Study population*

Participants will be recruited voluntarily according to the inclusion and exclusion criteria below.

Inclusion criteria:

1  
2  
3  
4 Patients scheduled for gastroscopy, ASA I-II level, aged 18-65 years, willing to  
5  
6 participate after reading and sign an informed consent.  
7

8  
9 Exclusion criteria:

- 10  
11 1. Body mass index (BMI)  $\geq 30$  kg/m<sup>2</sup>,
- 12  
13 2. Patients with preoperative circulatory, respiratory or nervous system diseases,
- 14  
15 3. Preoperative hemoglobin level less than 70 g/L or albumin level less than 30 g/L
- 16  
17 4. Patients with sleep apnea syndrome.
- 18  
19 5. Patients with URI (upper respiratory tract infection) symptom.
- 20  
21 6. Patients with dry cough history.
- 22  
23 7. Patients with drug allergy.
- 24  
25  
26  
27

### 28 29 ***Randomization and blinding***

30  
31 Stratified randomization will be used to assign the candidate subjects to five groups  
32  
33 according to sex and BMI (two groups or three groups). Computer-generated random  
34  
35 group numbers will be printed and placed into different sealed envelope in turn. When  
36  
37 receiving a subject who met the inclusion criteria, the anesthesiologist determined the  
38  
39 grouping of the newly recruited subject according to different group numbers in the  
40  
41 envelopes. The regimen will be blind to both anesthesiologists and patients. The drugs  
42  
43 will be prepared by nurse anesthetists and labeled with numbers. Then the  
44  
45 anesthesiologist will inject the medication. The nurse anesthetists will be responsible  
46  
47 for recoding. The anesthesiologist will be notified the study group by the nurse  
48  
49 anesthetists in case of emergency.  
50  
51  
52  
53  
54

### 55 56 ***Current sample size justification***

57  
58  
59  
60

1  
2  
3  
4 A total of 500 subjects were planned to be involved. The subjects will be randomly  
5  
6 divided into 5 groups: dezocine group, fentanyl group, oxycodone group, sufentanil  
7  
8 and the control group, 100 cases in each group. The sample size was estimated  
9  
10 according to the chi-square test of the incidence of the primary categorical outcome,  
11  
12 incidence of cough (30%) within 5 min after endoscope insertion. The above total  
13  
14 number of observations makes it possible to detect small to moderate effective size  
15  
16 (approximately 0.20) with Type I error 5% and power of test 90%. The test of power  
17  
18 will remain 80% or higher when up to 20% of the subjects dropout from the study.  
19  
20  
21  
22

### 23 ***Statistical analysis***

24  
25 All data will be analyzed using SAS 9.3 or other statistical software packages as  
26  
27 needed. The statistical methods included descriptive statistics, t-test,  $\chi^2$  test, analysis  
28  
29 of variance, univariate unconditional logistic regression analysis, multivariate linear  
30  
31 regression analysis. A significance level is set at 5%.  
32  
33  
34  
35

### 36 ***Sedation***

37  
38 Patients will fast for twelve hours before gastroscopy. Dyclonine will be orally taken  
39  
40 10 minutes prior to sedation. The right upper extremity venous access will be  
41  
42 established before the patients enter the operation room. After entering the operation  
43  
44 room, the patients will lie in the left-lateral position, with the blood pressure cuff tied  
45  
46 to the left upper arm, and receive oxygen inhalation via nasal cannula (3-5 L/min).  
47  
48 After placement of bite block, blood pressure, heart rate, and SpO<sub>2</sub> will be measured  
49  
50 noninvasively (Philips MP50, Germany) to set up baselines and will be monitored  
51  
52 throughout the operation afterwards. Blood pressure will be measured at an interval of  
53  
54  
55  
56  
57  
58  
59  
60

1  
2  
3  
4 1 minute. Then patients will intravenously receive 2-2.2 mg/kg propofol (Fresenius  
5  
6 Kabi AB, Germany) plus 0.5-0.8 ug/kg fentanyl (Humanwell Pharmaceutical, China),  
7  
8 2-2.2 mg/kg propofol plus 0.05-0.08 ug/kg sufentanil (Humanwell Pharmaceutical,  
9  
10 China), 2-2.2 mg/kg propofol plus 0.04-0.05 mg/kg dezocine (Yangtze River  
11  
12 Pharmaceutical, China), 2-2.2 mg/kg propofol plus 0.04-0.05 mg/kg oxycodone  
13  
14 (Monti Pharmaceutical, China), or 2.4-3 mg/kg propofol plus 2-2.5 ml saline. All  
15  
16 drugs except Propofol will be diluted with saline. The doses of dezocine and  
17  
18 oxycodone are defined according to our preliminary study. The 2 ml of normal saline  
19  
20 is for subjects weighing  $\leq 70$  kg, and the 2.5 ml of normal saline is for subjects  
21  
22 weighing  $>70$  kg. Fentanyl will be diluted to 20 ug/ml, sufentanil to 2.5ug/ml,  
23  
24 dezocine and oxycodone each to 1 mg/ml. Drugs will be delivered by the Aespire  
25  
26 7900 anesthesia delivery system (GE Healthcare, USA). We will insert the probe  
27  
28 when BIS (bispectral index) is 40-60. A BIS of 40-60 is usually considered as  
29  
30 sufficient depth of general anesthesia. Jaw thrust will be done in case of respiratory  
31  
32 depression and oxygen desaturation. If jaw thrust is not working, assistant ventilation  
33  
34 will be used. For severe situation, tracheal intubation assisted respiration will  
35  
36 performed. After gastroscopy, all the patients will stay PACU (post-anesthesia care  
37  
38 unit). Patients will be followed up until discharge of PACU.

#### 49 *Adverse events*

50  
51 All adverse events, such as nausea, vomiting, dyspnea, hypopnea, apnea, hypotension,  
52  
53 oxygen desaturation and bradycardia, will be recorded and closely monitored.  
54  
55 Medical strategy will be adjusted if necessary. Unexpected severe adverse events will  
56  
57  
58  
59  
60

1  
2  
3  
4 be reported to the ethics committee.

5  
6 ***Data collection and management***  
7

8  
9 Demographic variables and clinical data will be collected from all patients.  
10  
11 Furthermore, during operation, blood pressure, heart rate, oxygen saturation, blood  
12  
13 pressure will be monitored. The occurrence of swallowing, cough and giggling, body  
14  
15 movement, adverse events, whether jaw thrust, assistant ventilation, and additional  
16  
17 propofol is used and the duration of endoscopy will be recorded. Then, duration of  
18  
19 calls for eyes open and the Steward score after eyes open will be recorded. All data  
20  
21 will be collected throughout the study and will be securely managed in confidential  
22  
23 conditions. Data will be recorded automatically by the vital signs monitor and  
24  
25 anesthesia information system, and manually by a nurse anesthetist. The participants  
26  
27 will be referred by the participant number rather than names, throughout the study  
28  
29 unless otherwise specified. All relevant documents and files will be archived for five  
30  
31 years. Data can be only accessed by the investigators who sign the confidential  
32  
33 disclosure agreement and institutional or governmental auditors during the study. Data  
34  
35 without patient identification will be publicly accessible after the study. The process  
36  
37 will be monitored by the Institutional Ethics Committee (ICE) for Clinical Research  
38  
39 of Zhongda Hospital.  
40  
41  
42  
43  
44  
45  
46  
47

48  
49 ***Endpoints***  
50

51  
52 The primary endpoint is the incidence and reflex degree of cough and giggling, which  
53  
54 will be recorded within 5 min after endoscope insertion and throughout the procedure.  
55  
56 The severity of cough is defined according to cough intensity and whether leading to  
57  
58  
59  
60

1  
2  
3  
4 failure of endoscope insertion. The secondary endpoints include (1) the occurrence of  
5  
6 swallowing, body movement, and adverse events and whether jaw thrust, assistant  
7  
8 ventilation, and additional propofol is used, which will be recorded within five  
9  
10 minutes after endoscope insertion and throughout the procedure, and (2) duration of  
11  
12 calls for eyes open, the duration of procedure and Steward score [35] after eyes open.  
13  
14 Blood pressure, heart rate and SpO<sub>2</sub> will be monitored throughout the process.  
15  
16 "Patient satisfaction" is not included as a secondary outcome since patient can not  
17  
18 recall coughing or gagging.  
19  
20  
21  
22

### 23 ***Protocol amendments***

24  
25  
26 The current protocol version is v1.5 (11 June 2017). Any changes of the protocol  
27  
28 during the trial that may affect the conduct of the trial, the safety and the benefit of the  
29  
30 patients will require a formal amendment to the protocol.  
31  
32  
33  
34  
35

### 36 **Discussion**

37  
38 It is important to improve analgesia and sedation for gastroscopy. Opioids, which  
39  
40 exert favorable analgesic, sedative effect and inhibit the stress response, are an  
41  
42 important part of surgical anesthesia. The combination of opioids and propofol is the  
43  
44 most commonly used regimen for general anesthesia. Currently, a small dose of  
45  
46 fentanyl combined with propofol in sedation for gastroscopy have been used in  
47  
48 clinical practice. However, fentanyl has the potential risks of respiratory depression,  
49  
50 choking and the stiffness of chest wall muscles. Clinical study on other opioids for  
51  
52 gastroscopy, such as oxycodone, dezocine and sufentanil, is inadequate. Finding an  
53  
54  
55  
56  
57  
58  
59  
60



1  
2  
3  
4 adequate regimen is essential. Herein, we conduct this trial to evaluate the  
5  
6 combination of small doses of dezocine, oxycodone or sufentanil for gastroscopy.  
7  
8 This study observes the incidence and reflex degree of cough under sedation. This  
9  
10 trial compares propofol combined the above drugs to propofol alone and to propofol  
11  
12 with fentanil, allowing a broad screen for feasible regimen. There are limitations of  
13  
14 this study. This is a single-center, which may limit the generalization of this study.  
15  
16 Future multiple-center large-sample size study will be needed. The result of this  
17  
18 clinical trial can confirm the favorable effects of combination of propofol with  
19  
20 small-dose opioids, and can contribute to finding satisfying regimens for sedation for  
21  
22 gastroscopy.  
23  
24  
25  
26  
27  
28  
29  
30

### 31 **Trial status**

32  
33  
34 At the time of manuscript submission, the study is in the recruitment phase.  
35  
36  
37  
38

### 39 **Ethics and dissemination**

40  
41 This study has been approved by the Institutional Ethics Committee (ICE) for Clinical  
42  
43 Research of Zhongda Hospital, Affiliated to Southeast University (No.  
44  
45 2015ZDSYLL033.0) and is registered with the Chinese Clinical Trial Center  
46  
47 (ChiCTR-ICR-15006952). Only patients who give written informed consent will be  
48  
49 recruited. A model informed consent has been provided. The results of the trial will be  
50  
51 published in an international peer-reviewed journal.  
52  
53  
54  
55  
56  
57  
58  
59  
60

**Authors' contributions**

NY conceived of the study. NY and JX participated in its design and coordination. NY, JX, YZC, XL, JY and JX collected references and figured out the protocol. XL, YZC, JY and JX performed statistics analysis. NY and JX drafted the manuscript. All authors read and approved the final manuscript.

**Funding**

This research received no specific grant from any funding agency in the public, commercial or not-for-profit sectors.

**Competing interests**

The authors declare that they have no competing interests. The committee mentioned is independent from the sponsor and competing interests

## References

1. Standards of Practice Committee of the American Society for Gastrointestinal E, Lichtenstein DR, Jagannath S, et al. Sedation and anesthesia in GI endoscopy. *Gastrointest Endosc* 2008;**68**:815-26.
2. Soma Y, Saito H, Kishibe T, Takahashi T, Tanaka H, Munakata A. Evaluation of topical pharyngeal anesthesia for upper endoscopy including factors associated with patient tolerance. *Gastrointest Endosc* 2001;**53**:14-8.
3. Froehlich F, Schwizer W, Thorens J, Kohler M, Gonvers JJ, Fried M. Conscious sedation for gastroscopy: patient tolerance and cardiorespiratory parameters. *Gastroenterology* 1995;**108**:697-704.
4. Evans LT, Saberi S, Kim HM, Elta GH, Schoenfeld P. Pharyngeal anesthesia during sedated EGDs: is "the spray" beneficial? A meta-analysis and systematic review. *Gastrointest Endosc* 2006;**63**:761-6.
5. Triantafyllidis JK, Merikas E, Nikolakis D, Papalois AE. Sedation in gastrointestinal endoscopy: current issues. *World J Gastroenterol* 2013;**19**:463-81.
6. Porostocky P, Chiba N, Colacino P, Sadowski D, Singh H. A survey of sedation practices for colonoscopy in Canada. *Can J Gastroenterol* 2011;**25**:255-60.
7. Fanti L, Agostoni M, Gemma M, et al. Sedation and monitoring for gastrointestinal endoscopy: A nationwide web survey in Italy. *Dig Liver Dis* 2011;**43**:726-30.
8. Paspatis GA, Manolaraki MM, Tribonias G, et al. Endoscopic sedation in Greece: results from a nationwide survey for the Hellenic Foundation of

- 1  
2  
3 gastroenterology and nutrition. *Dig Liver Dis* 2009;**41**:807-11.  
4  
5  
6 9. Cohen LB, Wechsler JS, Gaetano JN, et al. Endoscopic sedation in the United States:  
7  
8 results from a nationwide survey. *Am J Gastroenterol* 2006;**101**:967-74.  
9  
10  
11 10. Riphhaus A, Rabofski M, Wehrmann T. Endoscopic sedation and monitoring  
12  
13 practice in Germany: results from the first nationwide survey. *Z*  
14  
15 *Gastroenterol* 2010;**48**:392-7.  
16  
17  
18 11. Baudet JS, Borque P, Borja E, et al. Use of sedation in gastrointestinal endoscopy:  
19  
20 a nationwide survey in Spain. *Eur J Gastroenterol Hepatol* 2009;**21**:882-8.  
21  
22  
23 12. Wehrmann T, Triantafyllou K. Propofol sedation in gastrointestinal endoscopy: a  
24  
25 gastroenterologist's perspective. *Digestion* 2010;**82**:106-9.  
26  
27  
28 13. Byrne MF, Chiba N, Singh H, Sadowski DC, Clinical Affairs Committee of the  
29  
30 Canadian Association of G. Propofol use for sedation during endoscopy in  
31  
32 adults: a Canadian Association of Gastroenterology position statement. *Can J*  
33  
34 *Gastroenterol* 2008;**22**:457-9.  
35  
36  
37 14. Inada T, Murao K, Shingu K, Yamada K, Nakao S, Nagata A. Effects of propofol  
38  
39 and thiopental on the central nervous system during nociceptive stimulation  
40  
41 in cats. *J Anesth* 2001;**15**:159-63.  
42  
43  
44 15. Lee TL, Ang SB, Dambisya YM, Adaikan GP, Lau LC. The effect of propofol on  
45  
46 human gastric and colonic muscle contractions. *Anesth Analg*  
47  
48 1999;**89**:1246-9.  
49  
50  
51 16. Fanti L, Testoni PA. Sedation and analgesia in gastrointestinal endoscopy: what's  
52  
53 new? *World J Gastroenterol* 2010;**16**:2451-7.  
54  
55  
56  
57  
58  
59  
60

- 1  
2  
3  
4  
5  
6  
7  
8  
9  
10  
11  
12  
13  
14  
15  
16  
17  
18  
19  
20  
21  
22  
23  
24  
25  
26  
27  
28  
29  
30  
31  
32  
33  
34  
35  
36  
37  
38  
39  
40  
41  
42  
43  
44  
45  
46  
47  
48  
49  
50  
51  
52  
53  
54  
55  
56  
57  
58  
59  
60
17. Cohen LB, Delegge MH, Aisenberg J, et al. AGA Institute review of endoscopic sedation. *Gastroenterology* 2007;**133**:675-701.
  18. Ho WM, Yen CM, Lan CH, et al. Comparison between the recovery time of alfentanil and fentanyl in balanced propofol sedation for gastrointestinal and colonoscopy: a prospective, randomized study. *BMC Gastroenterol* 2012;**12**:164.
  19. Poulos JE, Kalogerinis PT, Caudle JN. Propofol compared with combination propofol or midazolam/fentanyl for endoscopy in a community setting. *AANA J* 2013;**81**:31-6.
  20. Zhang L, Bao Y, Shi D. Comparing the pain of propofol via different combinations of fentanyl, sufentanil or remifentanyl in gastrointestinal endoscopy. *Acta Cir Bras* 2014;**29**:675-80.
  21. Xu ZY, Wang X, Si YY, et al. Intravenous remifentanyl and propofol for gastroscopy. *J Clin Anesth* 2008;**20**:352-5.
  22. LaPierre CD, Johnson KB, Randall BR, Egan TD. A simulation study of common propofol and propofol-opioid dosing regimens for upper endoscopy: implications on the time course of recovery. *Anesthesiology* 2012;**117**:252-62.
  23. Yamamoto S, Motokawa K, Toyooka H. Propofol may cause coughing when used as a sedative in patients undergoing orthopedic surgery under spinal anesthesia. *Anesthesia & Analgesia* 1998;**86**:529S.
  24. Mitra S, Sinha PK, Anand LK, Gombar KK. Propofol-induced violent coughing.

- 1  
2  
3  
4                   *Anaesthesia* 2000;**55**:707-8.  
5  
6  
7                   25. Tagaito Y, Isono S, Nishino T. Upper airway reflexes during a combination of  
8  
9                   propofol and fentanyl anesthesia. *The Journal of the American Society of*  
10  
11                   *Anesthesiologists* 1998;**88**:1459-66.  
12  
13  
14                   26. Koshy G, Nair S, Norkus EP, Hertan HI, Pitchumoni CS. Propofol versus  
15  
16                   midazolam and meperidine for conscious sedation in GI endoscopy. *Am J*  
17  
18                   *Gastroenterol* 2000;**95**:1476-9.  
19  
20  
21                   27. Yemen TA. Small doses of sufentanil will produce violent coughing in young  
22  
23                   children. *Anesthesiology* 1998;**89**:271-2.  
24  
25  
26                   28. Bohrer H, Fleischer F, Werning P. Tussive effect of a fentanyl bolus administered  
27  
28                   through a central venous catheter. *Anaesthesia* 1990;**45**:18-21.  
29  
30  
31                   29. Sedighinejad A, Naderi Nabi B, Haghghi M, et al. Propofol is Effective to  
32  
33                   Depress Fentanyl-Induced Cough during Induction of Anesthesia. *Anesth*  
34  
35                   *Pain Med* 2013;**2**:170-3.  
36  
37  
38                   30. Liu XS, Xu GH, Shen QY, et al. Dezocine prevents sufentanil-induced cough  
39  
40                   during general anesthesia induction: A randomized controlled trial.  
41  
42                   *Pharmacol Rep* 2015;**67**:52-5.  
43  
44  
45  
46                   31. Ramirez-Ruiz M, Smith I, White PF. Use of analgesics during propofol sedation: a  
47  
48                   comparison of ketorolac, dezocine, and fentanyl. *J Clin Anesth* 1995;**7**:481-5.  
49  
50  
51                   32. Lu Y, Ye Z, Wong GT, Dong C, Yu J. Prevention of injection pain due to propofol  
52  
53                   by dezocine: a comparison with lidocaine. *Indian J Pharmacol*  
54  
55                   2013;**45**:619-21.  
56  
57  
58  
59  
60

- 1  
2  
3  
4 33. Zheng M, Guo Y, Shan S, Yang S. Dezocine for anesthesia and stress reduction in  
5  
6 induced abortion. *Patient Prefer Adherence* 2015;**9**:369-72.  
7  
8  
9 34. Bell GD. Preparation, premedication, and surveillance. *Endoscopy* 2004;**36**:23-31.  
10  
11 35. Steward DJ. A simplified scoring system for the post-operative recovery room.  
12  
13 *Can Anaesth Soc J* 1975;**22**:111-3.  
14  
15  
16  
17  
18  
19  
20  
21  
22  
23  
24  
25  
26  
27  
28  
29  
30  
31  
32  
33  
34  
35  
36  
37  
38  
39  
40  
41  
42  
43  
44  
45  
46  
47  
48  
49  
50  
51  
52  
53  
54  
55  
56  
57  
58  
59  
60

1  
2  
3  
4  
5  
6  
7  
8  
9  
10  
11  
12  
13  
14  
15  
16  
17  
18  
19  
20  
21  
22  
23  
24  
25  
26  
27  
28  
29  
30  
31  
32  
33  
34  
35  
36  
37  
38  
39  
40  
41  
42  
43  
44  
45  
46  
47  
48  
49  
50  
51  
52  
53  
54  
55  
56  
57  
58  
59  
60

**Figure Legend**

Figure 1. Follow chart of the study.

For peer review only





Follow chart of the study.

292x182mm (300 x 300 DPI)

Review only

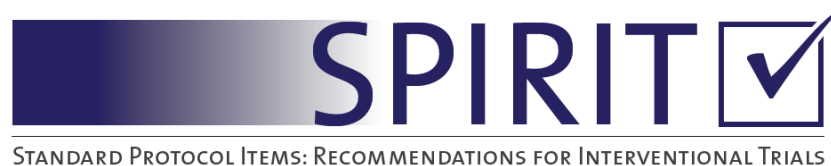

STANDARD PROTOCOL ITEMS: RECOMMENDATIONS FOR INTERVENTIONAL TRIALS

SPIRIT 2013 Checklist: Recommended items to address in a clinical trial protocol and related documents\*

| Section/item                      | Item No | Description                                                                                                                                                                                                                                                                              | Addressed on page number |
|-----------------------------------|---------|------------------------------------------------------------------------------------------------------------------------------------------------------------------------------------------------------------------------------------------------------------------------------------------|--------------------------|
| <b>Administrative information</b> |         |                                                                                                                                                                                                                                                                                          |                          |
| Title                             | 1       | Descriptive title identifying the study design, population, interventions, and, if applicable, trial acronym                                                                                                                                                                             | ___ 1 ___                |
| Trial registration                | 2a      | Trial identifier and registry name. If not yet registered, name of intended registry                                                                                                                                                                                                     | ___ 3 ___                |
|                                   | 2b      | All items from the World Health Organization Trial Registration Data Set                                                                                                                                                                                                                 | ___ NA ___               |
| Protocol version                  | 3       | Date and version identifier                                                                                                                                                                                                                                                              | ___ 11 ___               |
| Funding                           | 4       | Sources and types of financial, material, and other support                                                                                                                                                                                                                              | ___ NA ___               |
| Roles and responsibilities        | 5a      | Names, affiliations, and roles of protocol contributors                                                                                                                                                                                                                                  | ___ 1 ___                |
|                                   | 5b      | Name and contact information for the trial sponsor                                                                                                                                                                                                                                       | ___ NA ___               |
|                                   | 5c      | Role of study sponsor and funders, if any, in study design; collection, management, analysis, and interpretation of data; writing of the report; and the decision to submit the report for publication, including whether they will have ultimate authority over any of these activities | ___ NA ___               |
|                                   | 5d      | Composition, roles, and responsibilities of the coordinating centre, steering committee, endpoint adjudication committee, data management team, and other individuals or groups overseeing the trial, if applicable (see Item 21a for data monitoring committee)                         | ___ 10, 12 ___           |

1 **Introduction**

2

3 Background and 6a Description of research question and justification for undertaking the trial, including summary of relevant 4-5  
4 rationale studies (published and unpublished) examining benefits and harms for each intervention

5

6 6b Explanation for choice of comparators 5

7

8 Objectives 7 Specific objectives or hypotheses 5-6

9

10 Trial design 8 Description of trial design including type of trial (eg, parallel group, crossover, factorial, single group),  
11 allocation ratio, and framework (eg, superiority, equivalence, noninferiority, exploratory) 6  
12  
13

14 **Methods: Participants, interventions, and outcomes**

15

16 Study setting 9 Description of study settings (eg, community clinic, academic hospital) and list of countries where data will  
17 be collected. Reference to where list of study sites can be obtained 6  
18

19 Eligibility criteria 10 Inclusion and exclusion criteria for participants. If applicable, eligibility criteria for study centres and  
20 individuals who will perform the interventions (eg, surgeons, psychotherapists) 6-7  
21

22 Interventions 11a Interventions for each group with sufficient detail to allow replication, including how and when they will be  
23 administered 8-9  
24

25 11b Criteria for discontinuing or modifying allocated interventions for a given trial participant (eg, drug dose  
26 change in response to harms, participant request, or improving/worsening disease) 9  
27

28 11c Strategies to improve adherence to intervention protocols, and any procedures for monitoring adherence  
29 (eg, drug tablet return, laboratory tests) 8  
30

31 11d Relevant concomitant care and interventions that are permitted or prohibited during the trial NA  
32

33 Outcomes 12 Primary, secondary, and other outcomes, including the specific measurement variable (eg, systolic blood  
34 pressure), analysis metric (eg, change from baseline, final value, time to event), method of aggregation (eg,  
35 median, proportion), and time point for each outcome. Explanation of the clinical relevance of chosen  
36 efficacy and harm outcomes is strongly recommended 10-11  
37

38 Participant timeline 13 Time schedule of enrolment, interventions (including any run-ins and washouts), assessments, and visits for  
39 participants. A schematic diagram is highly recommended (see Figure) Figure 1  
40  
41  
42  
43  
44

1 Sample size 14 Estimated number of participants needed to achieve study objectives and how it was determined, including \_\_\_\_\_7\_\_\_\_\_  
 2 clinical and statistical assumptions supporting any sample size calculations

4 Recruitment 15 Strategies for achieving adequate participant enrolment to reach target sample size \_\_\_\_\_6\_\_\_\_\_  
 5

7 **Methods: Assignment of interventions (for controlled trials)**

9 Allocation:

11 Sequence 16a Method of generating the allocation sequence (eg, computer-generated random numbers), and list of any \_\_\_\_\_7\_\_\_\_\_  
 12 generation factors for stratification. To reduce predictability of a random sequence, details of any planned restriction  
 13 (eg, blocking) should be provided in a separate document that is unavailable to those who enrol participants  
 14 or assign interventions

17 Allocation 16b Mechanism of implementing the allocation sequence (eg, central telephone; sequentially numbered, \_\_\_\_\_7\_\_\_\_\_  
 18 concealment opaque, sealed envelopes), describing any steps to conceal the sequence until interventions are assigned  
 19 mechanism

21 Implementation 16c Who will generate the allocation sequence, who will enrol participants, and who will assign participants to \_\_\_\_\_7\_\_\_\_\_  
 22 interventions

25 Blinding (masking) 17a Who will be blinded after assignment to interventions (eg, trial participants, care providers, outcome \_\_\_\_\_7\_\_\_\_\_  
 26 assessors, data analysts), and how

28 17b If blinded, circumstances under which unblinding is permissible, and procedure for revealing a participant's \_\_\_\_\_7\_\_\_\_\_  
 29 allocated intervention during the trial

32 **Methods: Data collection, management, and analysis**

34 Data collection 18a Plans for assessment and collection of outcome, baseline, and other trial data, including any related \_\_\_\_\_10\_\_\_\_\_  
 35 methods processes to promote data quality (eg, duplicate measurements, training of assessors) and a description of  
 36 study instruments (eg, questionnaires, laboratory tests) along with their reliability and validity, if known.  
 37 Reference to where data collection forms can be found, if not in the protocol

40 18b Plans to promote participant retention and complete follow-up, including list of any outcome data to be \_\_\_\_\_10\_\_\_\_\_  
 41 collected for participants who discontinue or deviate from intervention protocols

|    |                                 |     |                                                                                                                                                                                                                                                                                                                                       |                 |
|----|---------------------------------|-----|---------------------------------------------------------------------------------------------------------------------------------------------------------------------------------------------------------------------------------------------------------------------------------------------------------------------------------------|-----------------|
| 1  | Data management                 | 19  | Plans for data entry, coding, security, and storage, including any related processes to promote data quality (eg, double data entry; range checks for data values). Reference to where details of data management procedures can be found, if not in the protocol                                                                     | _____10_____    |
| 2  |                                 |     |                                                                                                                                                                                                                                                                                                                                       |                 |
| 3  |                                 |     |                                                                                                                                                                                                                                                                                                                                       |                 |
| 4  |                                 |     |                                                                                                                                                                                                                                                                                                                                       |                 |
| 5  | Statistical methods             | 20a | Statistical methods for analysing primary and secondary outcomes. Reference to where other details of the statistical analysis plan can be found, if not in the protocol                                                                                                                                                              | _____8_____     |
| 6  |                                 |     |                                                                                                                                                                                                                                                                                                                                       |                 |
| 7  |                                 |     |                                                                                                                                                                                                                                                                                                                                       |                 |
| 8  |                                 | 20b | Methods for any additional analyses (eg, subgroup and adjusted analyses)                                                                                                                                                                                                                                                              | _____NA_____    |
| 9  |                                 |     |                                                                                                                                                                                                                                                                                                                                       |                 |
| 10 |                                 | 20c | Definition of analysis population relating to protocol non-adherence (eg, as randomised analysis), and any statistical methods to handle missing data (eg, multiple imputation)                                                                                                                                                       | _____8_____     |
| 11 |                                 |     |                                                                                                                                                                                                                                                                                                                                       |                 |
| 12 |                                 |     |                                                                                                                                                                                                                                                                                                                                       |                 |
| 13 |                                 |     |                                                                                                                                                                                                                                                                                                                                       |                 |
| 14 |                                 |     |                                                                                                                                                                                                                                                                                                                                       |                 |
| 15 | <b>Methods: Monitoring</b>      |     |                                                                                                                                                                                                                                                                                                                                       |                 |
| 16 |                                 |     |                                                                                                                                                                                                                                                                                                                                       |                 |
| 17 | Data monitoring                 | 21a | Composition of data monitoring committee (DMC); summary of its role and reporting structure; statement of whether it is independent from the sponsor and competing interests; and reference to where further details about its charter can be found, if not in the protocol. Alternatively, an explanation of why a DMC is not needed | _____9, 11_____ |
| 18 |                                 |     |                                                                                                                                                                                                                                                                                                                                       |                 |
| 19 |                                 |     |                                                                                                                                                                                                                                                                                                                                       |                 |
| 20 |                                 |     |                                                                                                                                                                                                                                                                                                                                       |                 |
| 21 |                                 |     |                                                                                                                                                                                                                                                                                                                                       |                 |
| 22 |                                 | 21b | Description of any interim analyses and stopping guidelines, including who will have access to these interim results and make the final decision to terminate the trial                                                                                                                                                               | _____9_____     |
| 23 |                                 |     |                                                                                                                                                                                                                                                                                                                                       |                 |
| 24 |                                 |     |                                                                                                                                                                                                                                                                                                                                       |                 |
| 25 |                                 |     |                                                                                                                                                                                                                                                                                                                                       |                 |
| 26 | Harms                           | 22  | Plans for collecting, assessing, reporting, and managing solicited and spontaneously reported adverse events and other unintended effects of trial interventions or trial conduct                                                                                                                                                     | _____9_____     |
| 27 |                                 |     |                                                                                                                                                                                                                                                                                                                                       |                 |
| 28 |                                 |     |                                                                                                                                                                                                                                                                                                                                       |                 |
| 29 | Auditing                        | 23  | Frequency and procedures for auditing trial conduct, if any, and whether the process will be independent from investigators and the sponsor                                                                                                                                                                                           | _____9_____     |
| 30 |                                 |     |                                                                                                                                                                                                                                                                                                                                       |                 |
| 31 |                                 |     |                                                                                                                                                                                                                                                                                                                                       |                 |
| 32 |                                 |     |                                                                                                                                                                                                                                                                                                                                       |                 |
| 33 | <b>Ethics and dissemination</b> |     |                                                                                                                                                                                                                                                                                                                                       |                 |
| 34 |                                 |     |                                                                                                                                                                                                                                                                                                                                       |                 |
| 35 | Research ethics approval        | 24  | Plans for seeking research ethics committee/institutional review board (REC/IRB) approval                                                                                                                                                                                                                                             | _____12_____    |
| 36 |                                 |     |                                                                                                                                                                                                                                                                                                                                       |                 |
| 37 |                                 |     |                                                                                                                                                                                                                                                                                                                                       |                 |
| 38 | Protocol amendments             | 25  | Plans for communicating important protocol modifications (eg, changes to eligibility criteria, outcomes, analyses) to relevant parties (eg, investigators, REC/IRBs, trial participants, trial registries, journals, regulators)                                                                                                      | _____11_____    |
| 39 |                                 |     |                                                                                                                                                                                                                                                                                                                                       |                 |
| 40 |                                 |     |                                                                                                                                                                                                                                                                                                                                       |                 |
| 41 |                                 |     |                                                                                                                                                                                                                                                                                                                                       |                 |
| 42 |                                 |     |                                                                                                                                                                                                                                                                                                                                       |                 |
| 43 |                                 |     |                                                                                                                                                                                                                                                                                                                                       |                 |
| 44 |                                 |     |                                                                                                                                                                                                                                                                                                                                       |                 |
| 45 |                                 |     |                                                                                                                                                                                                                                                                                                                                       |                 |
| 46 |                                 |     |                                                                                                                                                                                                                                                                                                                                       |                 |
| 47 |                                 |     |                                                                                                                                                                                                                                                                                                                                       |                 |

|    |                               |     |                                                                                                                                                                                                                                                                                     |                |
|----|-------------------------------|-----|-------------------------------------------------------------------------------------------------------------------------------------------------------------------------------------------------------------------------------------------------------------------------------------|----------------|
| 1  | Consent or assent             | 26a | Who will obtain informed consent or assent from potential trial participants or authorised surrogates, and how (see Item 32)                                                                                                                                                        | _____ 12 _____ |
| 2  |                               |     |                                                                                                                                                                                                                                                                                     |                |
| 3  |                               |     |                                                                                                                                                                                                                                                                                     |                |
| 4  |                               | 26b | Additional consent provisions for collection and use of participant data and biological specimens in ancillary studies, if applicable                                                                                                                                               | _____ NA _____ |
| 5  |                               |     |                                                                                                                                                                                                                                                                                     |                |
| 6  |                               |     |                                                                                                                                                                                                                                                                                     |                |
| 7  | Confidentiality               | 27  | How personal information about potential and enrolled participants will be collected, shared, and maintained in order to protect confidentiality before, during, and after the trial                                                                                                | _____ 10 _____ |
| 8  |                               |     |                                                                                                                                                                                                                                                                                     |                |
| 9  |                               |     |                                                                                                                                                                                                                                                                                     |                |
| 10 | Declaration of interests      | 28  | Financial and other competing interests for principal investigators for the overall trial and each study site                                                                                                                                                                       | _____ 12 _____ |
| 11 |                               |     |                                                                                                                                                                                                                                                                                     |                |
| 12 |                               |     |                                                                                                                                                                                                                                                                                     |                |
| 13 |                               |     |                                                                                                                                                                                                                                                                                     |                |
| 14 | Access to data                | 29  | Statement of who will have access to the final trial dataset, and disclosure of contractual agreements that limit such access for investigators                                                                                                                                     | _____ 10 _____ |
| 15 |                               |     |                                                                                                                                                                                                                                                                                     |                |
| 16 |                               |     |                                                                                                                                                                                                                                                                                     |                |
| 17 | Ancillary and post-trial care | 30  | Provisions, if any, for ancillary and post-trial care, and for compensation to those who suffer harm from trial participation                                                                                                                                                       | _____ NA _____ |
| 18 |                               |     |                                                                                                                                                                                                                                                                                     |                |
| 19 |                               |     |                                                                                                                                                                                                                                                                                     |                |
| 20 | Dissemination policy          | 31a | Plans for investigators and sponsor to communicate trial results to participants, healthcare professionals, the public, and other relevant groups (eg, via publication, reporting in results databases, or other data sharing arrangements), including any publication restrictions | _____ 10 _____ |
| 21 |                               |     |                                                                                                                                                                                                                                                                                     |                |
| 22 |                               |     |                                                                                                                                                                                                                                                                                     |                |
| 23 |                               |     |                                                                                                                                                                                                                                                                                     |                |
| 24 |                               |     |                                                                                                                                                                                                                                                                                     |                |
| 25 |                               | 31b | Authorship eligibility guidelines and any intended use of professional writers                                                                                                                                                                                                      | _____ NA _____ |
| 26 |                               |     |                                                                                                                                                                                                                                                                                     |                |
| 27 |                               | 31c | Plans, if any, for granting public access to the full protocol, participant-level dataset, and statistical code                                                                                                                                                                     | _____ 10 _____ |
| 28 |                               |     |                                                                                                                                                                                                                                                                                     |                |
| 29 |                               |     |                                                                                                                                                                                                                                                                                     |                |
| 30 | <b>Appendices</b>             |     |                                                                                                                                                                                                                                                                                     |                |
| 31 |                               |     |                                                                                                                                                                                                                                                                                     |                |
| 32 | Informed consent materials    | 32  | Model consent form and other related documentation given to participants and authorised surrogates                                                                                                                                                                                  | _____ 12 _____ |
| 33 |                               |     |                                                                                                                                                                                                                                                                                     |                |
| 34 |                               |     |                                                                                                                                                                                                                                                                                     |                |
| 35 | Biological specimens          | 33  | Plans for collection, laboratory evaluation, and storage of biological specimens for genetic or molecular analysis in the current trial and for future use in ancillary studies, if applicable                                                                                      | _____ NA _____ |
| 36 |                               |     |                                                                                                                                                                                                                                                                                     |                |
| 37 |                               |     |                                                                                                                                                                                                                                                                                     |                |

38  
39 \*It is strongly recommended that this checklist be read in conjunction with the SPIRIT 2013 Explanation & Elaboration for important clarification on the items.  
40 Amendments to the protocol should be tracked and dated. The SPIRIT checklist is copyrighted by the SPIRIT Group under the Creative Commons  
41 "[Attribution-NonCommercial-NoDerivs 3.0 Unported](https://creativecommons.org/licenses/by-nc-nd/3.0/)" license.  
42  
43  
44

# BMJ Open

## Effect of propofol combined with opioids on cough reflex suppression in gastroscopy: study protocol for a double-blind randomized controlled trial

|                                 |                                                                                                                                                                                                                                                                                                                                                                                                                                                                                                                                                                                                              |
|---------------------------------|--------------------------------------------------------------------------------------------------------------------------------------------------------------------------------------------------------------------------------------------------------------------------------------------------------------------------------------------------------------------------------------------------------------------------------------------------------------------------------------------------------------------------------------------------------------------------------------------------------------|
| Journal:                        | <i>BMJ Open</i>                                                                                                                                                                                                                                                                                                                                                                                                                                                                                                                                                                                              |
| Manuscript ID                   | bmjopen-2016-014881.R3                                                                                                                                                                                                                                                                                                                                                                                                                                                                                                                                                                                       |
| Article Type:                   | Protocol                                                                                                                                                                                                                                                                                                                                                                                                                                                                                                                                                                                                     |
| Date Submitted by the Author:   | 18-Jul-2017                                                                                                                                                                                                                                                                                                                                                                                                                                                                                                                                                                                                  |
| Complete List of Authors:       | Yin, Ning; Sir Run Run Hospital, Najing Medical University, Department of Anesthesiology<br>Xia, Jiangyan ; Zhongda Hospital, School of Medicine, Southeast University, Department of Anesthesiology<br>Cao, Yi-Zhi; Nanjing Medical University, School of Basic Medical Sciences<br>Lu, Xinjian ; Zhongda Hospital, School of Medicine, Southeast University, Department of Anesthesiology<br>Yuan, Jing ; Zhongda Hospital, School of Medicine, Southeast University, Department of Anesthesiology<br>Xie , Jue ; Zhongda Hospital, School of Medicine, Southeast University, Department of Anesthesiology |
| <b>Primary Subject Heading</b>: | Anaesthesia                                                                                                                                                                                                                                                                                                                                                                                                                                                                                                                                                                                                  |
| Secondary Subject Heading:      | Anaesthesia, Gastroenterology and hepatology                                                                                                                                                                                                                                                                                                                                                                                                                                                                                                                                                                 |
| Keywords:                       | sedation, propofol, opioids, Endoscopy < GASTROENTEROLOGY, cough                                                                                                                                                                                                                                                                                                                                                                                                                                                                                                                                             |
|                                 |                                                                                                                                                                                                                                                                                                                                                                                                                                                                                                                                                                                                              |

SCHOLARONE™  
Manuscripts

1  
2  
3  
4 **Effect of propofol combined with opioids on cough reflex suppression in**  
5  
6 **gastroscopy: study protocol for a double-blind randomized controlled trial**  
7  
8  
9

10  
11 Ning Yin<sup>1</sup>, Jiangyan Xia<sup>2</sup>, Yi-Zhi Cao<sup>3</sup>, Xinjian Lu<sup>2</sup>, Jing Yuan<sup>2</sup>, Jue Xie<sup>2</sup>  
12  
13

14  
15  
16 Department of Anesthesiology, Sir Run Run Hospital, Nanjing Medical University,  
17  
18 Nanjing 211166, China  
19

20  
21 Department of Anesthesiology, Zhongda Hospital, School of Medicine, Southeast  
22  
23 University, Nanjing 210009, China  
24

25  
26 School of Basic Medical Sciences, Nanjing Medical University, Nanjing 211166,  
27  
28 China  
29  
30

31  
32  
33  
34 **Corresponding author:**  
35

36 Ning Yin. Phone: +86-025-87115710; Email: dr.ningyin@tom.com; Address: 109  
37  
38 Longmian Avenue, Nanjing 210029, Jiangsu, China  
39  
40  
41  
42  
43  
44  
45  
46  
47  
48  
49  
50  
51  
52  
53  
54  
55  
56  
57  
58  
59  
60



## Abstract

**Introduction:** The best methods for analgesia and sedation for gastroscopy are still in debate and finding an adequate regimen of sedation/analgesia is important. Stimulation of the larynx under sedation can cause reflex responses. Propofol with opioids has been recommended for gastroscopy sedation but the effects on cough reflex suppression remains unclear. This trial will evaluate the effects of propofol combined with small doses of dezocine, oxycodone, sufentanil, or fentanyl for gastroscopy. We hypothesize that combination of propofol and oxycodone may have better performance. We will observe the incidence and reflex degree of cough and giggling under sedation when using propofol combined with the above drugs or propofol alone. This study will allow a broad screen for feasible regimen.

**Methods and analysis:** This will be a prospective, randomized, double-blind, controlled trial. Patients scheduled for gastroscopy, ASA I-II level, aged 18-65 years will be included. A total of 500 subjects are planned to be randomized to intravenously receive 2-2.2 mg/kg propofol plus 0.5-0.8 ug/kg fentanyl (fentanyl group), 2-2.2 mg/kg propofol plus 0.05-0.08 ug/kg sufentanil (sufentanil group), 2-2.2 mg/kg propofol plus 0.04-0.05 mg/kg dezocine (dezocine group), 2-2.2 mg/kg propofol plus 0.04-0.05 mg/kg oxycodone (oxycodone group), or 2.4-3 mg/kg propofol plus 2-2.5 ml saline (control group) for sedation. The primary endpoint is the incidence and reflex degree of cough and giggling. The secondary endpoints include occurrence of discomfort or side effects, whether jaw thrust, assistant ventilation, and additional propofol is used, recovery time, duration of procedure and Steward Score.

1  
2  
3  
4 **Ethics and dissemination:** This study has been approved by the Institutional Ethics  
5  
6 Committee for Clinical Research of Zhongda Hospital, Affiliated to Southeast  
7  
8 University (No. 2015ZDSYLL033.0). The results of the trial will be published in an  
9  
10 international peer-reviewed journal.  
11

12  
13  
14 **Trial registration:** This study was registered with the Chinese Clinical Trial Center  
15  
16 (No. ChiCTR-ICR-15006952).  
17

18  
19  
20  
21 **Keywords:** sedation, endoscopy, propofol, opioids, cough  
22

#### 23 24 25 26 **Strengths and limitations of this study** 27

- 28  
29 ▪ This study is the first randomized controlled trial investigating the effect of  
30  
31 dezocine and oxycodone on cough reflex suppression when combining propofol  
32  
33 during gastroscopy.  
34
- 35  
36 ▪ This study focuses on the antitussive effects of a wide range of opioids, which  
37  
38 few previous studies have addressed.  
39
- 40  
41 ▪ Mythological strengths include appropriate sample size, stratified randomization  
42  
43 and double-blind placebo-controlled design.  
44
- 45  
46 ▪ This is a single-center, which could be a limitation of this study.  
47
- 48  
49 ▪ The dose of propofol for this study could be a limitation, which is relatively high  
50  
51 and may have a risk to abolish the effects of the opioids examined in this study.  
52  
53  
54  
55  
56  
57  
58  
59  
60

## Introduction

Gastroscopy is an important and common endoscopic method of diagnosis and treatment of digestive diseases. However, during gastroscopy, patients' anxiety and discomfort such as throat irritation, cough, and nausea usually occur, which may affect the endoscopic operation, resulting in low examination quality, and consequently decrease the willingness of patients to undergo a repeated procedure. Pharyngeal anesthesia and sedation/anesthesia ranging from minimal sedation to general anesthesia have been used to relieve anxiety and discomfort, allowing a successful procedure [1-5].

Currently, endoscopic sedation has been widely applied in routine practice, with propofol sedation being endorsed [5-12]. Propofol is an intravenously administered sedative with a rapid onset and short duration of action [13]. Propofol has a favorable sedative effect and a wide range of inhibition effects on the central nervous system [14]. Propofol also strongly inhibits the contraction of gastrointestinal smooth muscles, antagonizes the vomiting reflex and reduces cough and body movement [5 15 16]. The incidences of postoperative headache, nausea and vomiting are low, and propofol even reduces nausea and vomiting [17]. Therefore, it has been widely used for sedation for gastroscopic procedures. Propofol is often used as a single agent. However, it has short duration of clinical effect. Inadequate sedation with propofol alone is seen, which requires additional doses. The duration of gastroscopy is relatively short, usually lasting for 10 minutes, but repeated addition of propofol can significantly prolong the recovery time, increasing the risk of post-procedure

1  
2  
3  
4 respiratory depression and hypoxemia, and the workload of recovery management.

5  
6 The use of propofol in combination with opioids has been proposed to improve  
7  
8 sedation and analgesia regarding the aspects such as recovery time, sedative effect,  
9  
10 pain and other discomfort [18-22].

11  
12  
13 Cough is a defensive airway reflex. The epithelium cough receptors are sensitive to  
14  
15 both mechanical and chemical stimuli. Sedatives and analgesics have inhibitory  
16  
17 effects on airway reflex. However, propofol may still have the chance to cause cough  
18  
19 [23 24]. Moreover, stimulation of the larynx during propofol anesthesia can cause  
20  
21 various types of reflex responses [25]. Although opioids exert favorable analgesic and  
22  
23 sedative effects [20 26], and can inhibit the pharyngeal reflex and stress response,  
24  
25 intravenous fentanyl- and sufentanil-induced coughing is not uncommon [27 28]. The  
26  
27 induced cough, can be reduced by propofol [29] and interestingly, by another opioid,  
28  
29 dezocine [30]. Dezocine is an opioid analgesic acting on  $\mu$ -,  $\delta$ - and  $\kappa$ -opioid receptors  
30  
31 and has been used in propofol sedation [31-33]. Oxycodone is an opioid alkaloid  
32  
33 acting on  $\mu$ - and  $\kappa$ -opioid receptors. It shows a good performance on relieving visceral  
34  
35 pain with small respiratory depression and is known to depress cough reflex. Unlike  
36  
37 fentanyl or sufentanil, dezocine and oxycodone have rarely been studied in  
38  
39 combination with propofol for gastroscopy.

40  
41  
42 The best methods for analgesia and sedation for gastroscopy are still in debate and  
43  
44 finding an adequate regimen of sedation/analgesia is important, which can influence  
45  
46 the quality of the examination, the patient's cooperation, and the patient's and  
47  
48 physician's satisfaction with the sedation [5 16 34]. Based on our preliminary  
49  
50  
51  
52  
53  
54  
55  
56  
57  
58  
59  
60

1  
2  
3  
4 observation in clinical practice, we hypothesize that combination of propofol and  
5  
6 low-dose dezocine, oxycodone or sufentanil for gastroscopy may decrease the  
7  
8 incidence of cough and that specifically, combination of propofol and oxycodone may  
9  
10 have a better performance than others.  
11

12  
13 In order to verify our hypothesis, we designed this clinical study, aiming to investigate  
14  
15 the effect of combination of propofol and opioids on cough reflex suppression in  
16  
17 gastroscopy.  
18  
19  
20  
21  
22

## 23 **Methods and analysis**

### 24 ***Study objective***

25  
26 The primary objective of this study is to investigate the incidence and reflex degree of  
27  
28 cough and giggling under sedation with combination of propofol and fentanil  
29  
30 sufentanil, dezocine, or oxycodone during gastroscopy. The secondary objective is to  
31  
32 assess the effect of the combination regimens on sedative performance.  
33  
34  
35  
36  
37

### 38 ***Study location***

39  
40 A prospective, single-center, randomized, double-blinded, controlled trial will be  
41  
42 conducted in patients undergoing gastroscopy in the Affiliated Zhongda Hospital of  
43  
44 Southeast University, China.  
45  
46  
47

### 48 ***Study population***

49  
50 Participants will be recruited voluntarily according to the inclusion and exclusion  
51  
52 criteria below.  
53  
54

55  
56 Inclusion criteria:  
57  
58  
59  
60

1  
2  
3  
4 Patients scheduled for gastroscopy, ASA I-II level, aged 18-65 years, and willing to  
5  
6 participate after reading and signing an informed consent.  
7

8  
9 Exclusion criteria:

- 10  
11 1. Body mass index (BMI)  $\geq 30$  kg/m<sup>2</sup>,
- 12  
13 2. Patients with preoperative circulatory, respiratory or nervous system diseases,
- 14  
15 3. Preoperative hemoglobin level less than 70 g/L or albumin level less than 30 g/L
- 16  
17 4. Patients with sleep apnea syndrome.
- 18  
19 5. Patients with URI (upper respiratory tract infection) symptom.
- 20  
21 6. Patients with dry cough history.
- 22  
23 7. Patients with drug allergy.
- 24  
25  
26  
27

### 28 29 ***Randomization and blinding***

30  
31 Stratified randomization will be used to assign the candidate subjects to five groups  
32  
33 according to sex and BMI (two groups or three groups). Computer-generated random  
34  
35 group numbers will be printed and placed into different sealed envelopes in turn.  
36  
37  
38 When receiving a subject who meets the inclusion criteria, the anesthesiologist  
39  
40 determined the grouping of the newly recruited subject according to the different  
41  
42 group numbers in the envelopes. The regimen will be blind to both anesthesiologists  
43  
44 and patients. The drugs will be prepared by nurse anesthetists and labeled with  
45  
46 numbers. Then the anesthesiologist will inject the medication. The nurse anesthetists  
47  
48 will be responsible for recoding. The anesthesiologist will be notified the study group  
49  
50 by the nurse anesthetists in case of emergency.  
51  
52  
53  
54

### 55 56 ***Current sample size justification***

57  
58  
59  
60

1  
2  
3  
4 A total of 500 subjects are planned to be involved. The subjects will be randomly  
5  
6 divided into 5 groups: dezocine group, fentanyl group, oxycodone group, sufentanil  
7  
8 and control group, with 100 cases in each group. The sample size was estimated  
9  
10 according to the chi-square test of the incidence of the primary categorical outcome,  
11  
12 incidence of cough (30%) within 5 min after endoscope insertion. The above total  
13  
14 number of observations made it possible to detect small to moderate effective size  
15  
16 (approximately 0.20) with the Type I error 5% and power of test 90%. The test of  
17  
18 power will remain 80% or higher when up to 20% of the subjects dropout from the  
19  
20 study.  
21  
22  
23  
24

### 25 26 *Statistical analysis*

27  
28 All data will be analyzed using SAS 9.3 or other statistical software packages as  
29  
30 needed. The statistical methods will include descriptive statistics, t-test,  $\chi^2$  test,  
31  
32 analysis of variance, univariate unconditional logistic regression analysis, multivariate  
33  
34 linear regression analysis. A significance level is set at 5%.  
35  
36  
37  
38

### 39 40 *Sedation*

41  
42 Patients will fast for twelve hours before gastroscopy. Dyclonine will be orally taken  
43  
44 10 minutes prior to sedation. The right upper extremity venous access will be  
45  
46 established before the patients enter the operation room. After entering the operation  
47  
48 room, the patients will lie in the left-lateral position, with the blood pressure cuff tied  
49  
50 to the left upper arm, and receive oxygen inhalation via nasal cannula (3-5 L/min).  
51  
52 After the placement of bite block, blood pressure, heart rate, and SpO<sub>2</sub> will be  
53  
54 measured noninvasively (Philips MP50, Germany) to set up baselines and will be  
55  
56  
57  
58  
59  
60

1  
2  
3  
4 monitored throughout the operation. Blood pressure will be measured at an interval of  
5  
6 1 minute. Then patients will intravenously receive 2-2.2 mg/kg propofol (Fresenius  
7  
8 Kabi AB, Germany) plus 0.5-0.8 ug/kg fentanyl (Humanwell Pharmaceutical, China),  
9  
10 2-2.2 mg/kg propofol plus 0.05-0.08 ug/kg sufentanil (Humanwell Pharmaceutical,  
11  
12 China), 2-2.2 mg/kg propofol plus 0.04-0.05 mg/kg dezocine (Yangtze River  
13  
14 Pharmaceutical, China), 2-2.2 mg/kg propofol plus 0.04-0.05 mg/kg oxycodone  
15  
16 (Monti Pharmaceutical, China), or 2.4-3 mg/kg propofol plus 2-2.5 ml saline. All  
17  
18 drugs except Propofol will be diluted with saline. The doses of dezocine and  
19  
20 oxycodone are defined according to our preliminary study. The 2 ml of normal saline  
21  
22 is for subjects weighing  $\leq 70$  kg, and the 2.5 ml of normal saline is for subjects  
23  
24 weighing  $>70$  kg. Fentanyl will be diluted to 20 ug/ml, sufentanil to 2.5ug/ml,  
25  
26 dezocine and oxycodone each to 1 mg/ml. Drugs will be delivered by the Aespire  
27  
28 7900 anesthesia delivery system (GE Healthcare, USA). We will insert the probe  
29  
30 when the BIS (bispectral index) is 40-60. A BIS of 40-60 is usually considered as  
31  
32 sufficient depth of general anesthesia. Jaw thrust will be done in case of respiratory  
33  
34 depression and oxygen desaturation. If jaw thrust is not working, assistant ventilation  
35  
36 will be used. For severe situation, tracheal intubation assisted respiration will  
37  
38 performed. After gastroscopy, all the patients will stay PACU (post-anesthesia care  
39  
40 unit). Patients will be followed up until discharge of PACU.

### 51 *Adverse events*

52  
53 All adverse events, such as nausea, vomiting, dyspnea, hypopnea, apnea, hypotension,  
54  
55 oxygen desaturation and bradycardia, will be recorded and closely monitored.  
56  
57  
58  
59  
60



1  
2  
3  
4 Medical strategy will be adjusted if necessary. Unexpected severe adverse events will  
5  
6 be reported to the ethics committee.  
7

### 8 ***Data collection and management***

9  
10 Demographic variables and clinical data will be collected from all patients.  
11  
12 Furthermore, during operation, blood pressure, heart rate, oxygen saturation, blood  
13  
14 pressure will be monitored. The occurrence of swallowing, cough and giggling, body  
15  
16 movement, adverse events, whether jaw thrust, assistant ventilation, and additional  
17  
18 propofol is used and the duration of endoscopy will be recorded. Then, duration of  
19  
20 calls for eyes open and the Steward score after eyes open will be recorded. All data  
21  
22 will be collected throughout the study and will be securely managed in confidential  
23  
24 conditions. Automatic data collection will be performed by the vital signs monitor and  
25  
26 anesthesia information system. Manual data collection will be performed by a nurse  
27  
28 anesthetist. The participants will be referred by the participant number rather than  
29  
30 names throughout the study unless otherwise specified. All relevant documents and  
31  
32 files will be archived for five years. Data can be only accessed by the investigators  
33  
34 who sign the confidential disclosure agreement and by the institutional or  
35  
36 governmental auditors during the study. Data without patient identification will be  
37  
38 publicly accessible after the study. The process will be monitored by the Institutional  
39  
40 Ethics Committee (ICE) for Clinical Research of Zhongda Hospital.  
41  
42  
43  
44  
45  
46  
47  
48  
49

### 50 ***Endpoints***

51  
52 The primary endpoint is the incidence and reflex degree of cough and giggling, which  
53  
54 will be recorded within 5 min after endoscope insertion and throughout the procedure.  
55  
56  
57  
58  
59  
60

1  
2  
3  
4 The severity of cough is defined according to cough intensity and whether leading to  
5  
6 failure of endoscope insertion. The secondary endpoints include (1) the occurrence of  
7  
8 swallowing, body movement, and adverse events and whether jaw thrust, assistant  
9  
10 ventilation, and additional propofol is used, which will be recorded within five  
11  
12 minutes after endoscope insertion and throughout the procedure, and (2) duration of  
13  
14 calls for eyes open, the duration of procedure and Steward score [35] after eyes open.  
15  
16 Blood pressure, heart rate and SpO<sub>2</sub> will be monitored throughout the process.  
17  
18 "Patient satisfaction" is not included as a secondary outcome since patient can not  
19  
20 recall coughing or gagging.  
21  
22  
23  
24

### 25 26 *Protocol amendments*

27  
28 The current protocol version is v1.5 (11 June 2017). Any changes of the protocol  
29  
30 during the trial that may affect the conduct of the trial, the safety and the benefit of the  
31  
32 patients will require a formal amendment to the protocol.  
33  
34  
35  
36  
37  
38

### 39 **Discussion**

40  
41 It is important to improve analgesia and sedation for gastroscopy. Opioids, which  
42  
43 exert favorable analgesic, sedative effect and inhibit the stress response, are an  
44  
45 important part of surgical anesthesia. The combination of opioids and propofol is the  
46  
47 most commonly used regimen for general anesthesia. Currently, a small dose of  
48  
49 fentanyl combined with propofol in sedation for gastroscopy has been used in clinical  
50  
51 practice. However, fentanyl has the potential risks of respiratory depression, choking  
52  
53 and the stiffness of chest wall muscles. Clinical study on other opioids for gastroscopy,  
54  
55  
56  
57  
58  
59  
60

1  
2  
3  
4 such as oxycodone, dezocine and sufentanil, is rare. Finding an adequate regimen is  
5  
6 essential. Herein, we conduct this trial to evaluate the combination of small doses of  
7  
8 dezocine, oxycodone or sufentanil for gastroscopy. This study observes the incidence  
9  
10 and reflex degree of cough under sedation. There are limitations of this study. This is  
11  
12 a single-center, which may limit the generalization of this study. Future  
13  
14 multiple-center large-sample size study will be needed. The dose of propofol for this  
15  
16 study is relatively high and may have a risk to abolish the effects of the opioids  
17  
18 examined in this study. The result of this clinical trial can confirm the favorable  
19  
20 effects of combination of propofol with small-dose opioids, and can contribute to  
21  
22 finding satisfying regimens for sedation for gastroscopy.  
23  
24  
25  
26  
27  
28  
29  
30

### 31 **Trial status**

32  
33  
34 At the time of manuscript submission, the study is in the recruitment phase.  
35  
36  
37  
38

### 39 **Ethics and dissemination**

40  
41 This study has been approved by the Institutional Ethics Committee (ICE) for Clinical  
42  
43 Research of Zhongda Hospital, Affiliated to Southeast University (No.  
44  
45 2015ZDSYLL033.0) and is registered with the Chinese Clinical Trial Center  
46  
47 (ChiCTR-ICR-15006952). Only patients who give written informed consent will be  
48  
49 recruited. A model informed consent has been provided. The results of the trial will be  
50  
51 published in an international peer-reviewed journal.  
52  
53  
54  
55  
56  
57  
58  
59  
60

### Consent

Each participant will be asked to carefully read the informed consent by the doctors of the research team. The doctors are responsible for explaining all relevant information of this study. Participants must sign the informed consent voluntarily. The signed informed consent will be obtained by the doctors of the research team and bring to the nurse anesthetist responsible for the management of those files.

### Authors' contributions

NY conceived of the study. NY and JX participated in its design and coordination. NY, JX, YZC, XL, JY and JX collected references and figured out the protocol. XL, YZC, JY and JX performed statistics analysis. NY and JX drafted the manuscript. All authors read and approved the final manuscript.

### Funding

This research received no specific grant from any funding agency in the public, commercial or not-for-profit sectors.

### Competing interests

The authors declare that they have no competing interests. The committee mentioned is independent from the sponsor and competing interests

## References

1. Standards of Practice Committee of the American Society for Gastrointestinal E, Lichtenstein DR, Jagannath S, et al. Sedation and anesthesia in GI endoscopy. *Gastrointest Endosc* 2008;**68**:815-26.
2. Soma Y, Saito H, Kishibe T, Takahashi T, Tanaka H, Munakata A. Evaluation of topical pharyngeal anesthesia for upper endoscopy including factors associated with patient tolerance. *Gastrointest Endosc* 2001;**53**:14-8.
3. Froehlich F, Schwizer W, Thorens J, Kohler M, Gonvers JJ, Fried M. Conscious sedation for gastroscopy: patient tolerance and cardiorespiratory parameters. *Gastroenterology* 1995;**108**:697-704.
4. Evans LT, Saberi S, Kim HM, Elta GH, Schoenfeld P. Pharyngeal anesthesia during sedated EGDs: is "the spray" beneficial? A meta-analysis and systematic review. *Gastrointest Endosc* 2006;**63**:761-6.
5. Triantafyllidis JK, Merikas E, Nikolakis D, Papalois AE. Sedation in gastrointestinal endoscopy: current issues. *World J Gastroenterol* 2013;**19**:463-81.
6. Porostocky P, Chiba N, Colacino P, Sadowski D, Singh H. A survey of sedation practices for colonoscopy in Canada. *Can J Gastroenterol* 2011;**25**:255-60.
7. Fanti L, Agostoni M, Gemma M, et al. Sedation and monitoring for gastrointestinal endoscopy: A nationwide web survey in Italy. *Dig Liver Dis* 2011;**43**:726-30.
8. Paspatis GA, Manolaraki MM, Tribonias G, et al. Endoscopic sedation in Greece: results from a nationwide survey for the Hellenic Foundation of

- 1  
2  
3 gastroenterology and nutrition. *Dig Liver Dis* 2009;**41**:807-11.  
4  
5  
6 9. Cohen LB, Wechsler JS, Gaetano JN, et al. Endoscopic sedation in the United States:  
7  
8 results from a nationwide survey. *Am J Gastroenterol* 2006;**101**:967-74.  
9  
10  
11 10. Riphhaus A, Rabofski M, Wehrmann T. Endoscopic sedation and monitoring  
12  
13 practice in Germany: results from the first nationwide survey. *Z*  
14  
15 *Gastroenterol* 2010;**48**:392-7.  
16  
17  
18 11. Baudet JS, Borque P, Borja E, et al. Use of sedation in gastrointestinal endoscopy:  
19  
20 a nationwide survey in Spain. *Eur J Gastroenterol Hepatol* 2009;**21**:882-8.  
21  
22  
23 12. Wehrmann T, Triantafyllou K. Propofol sedation in gastrointestinal endoscopy: a  
24  
25 gastroenterologist's perspective. *Digestion* 2010;**82**:106-9.  
26  
27  
28 13. Byrne MF, Chiba N, Singh H, Sadowski DC, Clinical Affairs Committee of the  
29  
30 Canadian Association of G. Propofol use for sedation during endoscopy in  
31  
32 adults: a Canadian Association of Gastroenterology position statement. *Can J*  
33  
34 *Gastroenterol* 2008;**22**:457-9.  
35  
36  
37 14. Inada T, Murao K, Shingu K, Yamada K, Nakao S, Nagata A. Effects of propofol  
38  
39 and thiopental on the central nervous system during nociceptive stimulation  
40  
41 in cats. *J Anesth* 2001;**15**:159-63.  
42  
43  
44 15. Lee TL, Ang SB, Dambisya YM, Adaikan GP, Lau LC. The effect of propofol on  
45  
46 human gastric and colonic muscle contractions. *Anesth Analg*  
47  
48 1999;**89**:1246-9.  
49  
50  
51 16. Fanti L, Testoni PA. Sedation and analgesia in gastrointestinal endoscopy: what's  
52  
53 new? *World J Gastroenterol* 2010;**16**:2451-7.  
54  
55  
56  
57  
58  
59  
60

- 1  
2  
3  
4  
5  
6  
7  
8  
9  
10  
11  
12  
13  
14  
15  
16  
17  
18  
19  
20  
21  
22  
23  
24  
25  
26  
27  
28  
29  
30  
31  
32  
33  
34  
35  
36  
37  
38  
39  
40  
41  
42  
43  
44  
45  
46  
47  
48  
49  
50  
51  
52  
53  
54  
55  
56  
57  
58  
59  
60
17. Cohen LB, Delegge MH, Aisenberg J, et al. AGA Institute review of endoscopic sedation. *Gastroenterology* 2007;**133**:675-701.
18. Ho WM, Yen CM, Lan CH, et al. Comparison between the recovery time of alfentanil and fentanyl in balanced propofol sedation for gastrointestinal and colonoscopy: a prospective, randomized study. *BMC Gastroenterol* 2012;**12**:164.
19. Poulos JE, Kalogerinis PT, Caudle JN. Propofol compared with combination propofol or midazolam/fentanyl for endoscopy in a community setting. *AANA J* 2013;**81**:31-6.
20. Zhang L, Bao Y, Shi D. Comparing the pain of propofol via different combinations of fentanyl, sufentanil or remifentanyl in gastrointestinal endoscopy. *Acta Cir Bras* 2014;**29**:675-80.
21. Xu ZY, Wang X, Si YY, et al. Intravenous remifentanyl and propofol for gastroscopy. *J Clin Anesth* 2008;**20**:352-5.
22. LaPierre CD, Johnson KB, Randall BR, Egan TD. A simulation study of common propofol and propofol-opioid dosing regimens for upper endoscopy: implications on the time course of recovery. *Anesthesiology* 2012;**117**:252-62.
23. Yamamoto S, Motokawa K, Toyooka H. Propofol may cause coughing when used as a sedative in patients undergoing orthopedic surgery under spinal anesthesia. *Anesthesia & Analgesia* 1998;**86**:529S.
24. Mitra S, Sinha PK, Anand LK, Gombar KK. Propofol-induced violent coughing.

- 1  
2  
3  
4 *Anaesthesia* 2000;**55**:707-8.  
5  
6  
7 25. Tagaito Y, Isono S, Nishino T. Upper airway reflexes during a combination of  
8  
9 propofol and fentanyl anesthesia. *The Journal of the American Society of*  
10  
11 *Anesthesiologists* 1998;**88**:1459-66.  
12  
13  
14 26. Koshy G, Nair S, Norkus EP, Hertan HI, Pitchumoni CS. Propofol versus  
15  
16 midazolam and meperidine for conscious sedation in GI endoscopy. *Am J*  
17  
18 *Gastroenterol* 2000;**95**:1476-9.  
19  
20  
21 27. Yemen TA. Small doses of sufentanil will produce violent coughing in young  
22  
23 children. *Anesthesiology* 1998;**89**:271-2.  
24  
25  
26 28. Bohrer H, Fleischer F, Werning P. Tussive effect of a fentanyl bolus administered  
27  
28 through a central venous catheter. *Anaesthesia* 1990;**45**:18-21.  
29  
30  
31 29. Sedighinejad A, Naderi Nabi B, Haghghi M, et al. Propofol is Effective to  
32  
33 Depress Fentanyl-Induced Cough during Induction of Anesthesia. *Anesth*  
34  
35 *Pain Med* 2013;**2**:170-3.  
36  
37  
38 30. Liu XS, Xu GH, Shen QY, et al. Dezocine prevents sufentanil-induced cough  
39  
40 during general anesthesia induction: A randomized controlled trial.  
41  
42 *Pharmacol Rep* 2015;**67**:52-5.  
43  
44  
45  
46 31. Ramirez-Ruiz M, Smith I, White PF. Use of analgesics during propofol sedation: a  
47  
48 comparison of ketorolac, dezocine, and fentanyl. *J Clin Anesth* 1995;**7**:481-5.  
49  
50  
51 32. Lu Y, Ye Z, Wong GT, Dong C, Yu J. Prevention of injection pain due to propofol  
52  
53 by dezocine: a comparison with lidocaine. *Indian J Pharmacol*  
54  
55 2013;**45**:619-21.  
56  
57  
58  
59  
60



- 1  
2  
3  
4 33. Zheng M, Guo Y, Shan S, Yang S. Dezocine for anesthesia and stress reduction in  
5  
6 induced abortion. *Patient Prefer Adherence* 2015;**9**:369-72.  
7  
8  
9 34. Bell GD. Preparation, premedication, and surveillance. *Endoscopy* 2004;**36**:23-31.  
10  
11 35. Steward DJ. A simplified scoring system for the post-operative recovery room.  
12  
13  
14 *Can Anaesth Soc J* 1975;**22**:111-3.  
15  
16  
17  
18  
19  
20  
21  
22  
23  
24  
25  
26  
27  
28  
29  
30  
31  
32  
33  
34  
35  
36  
37  
38  
39  
40  
41  
42  
43  
44  
45  
46  
47  
48  
49  
50  
51  
52  
53  
54  
55  
56  
57  
58  
59  
60

1  
2  
3  
4  
5  
6  
7  
8  
9  
10  
11  
12  
13  
14  
15  
16  
17  
18  
19  
20  
21  
22  
23  
24  
25  
26  
27  
28  
29  
30  
31  
32  
33  
34  
35  
36  
37  
38  
39  
40  
41  
42  
43  
44  
45  
46  
47  
48  
49  
50  
51  
52  
53  
54  
55  
56  
57  
58  
59  
60

**Figure Legend**

Figure 1. Follow chart of the study.

For peer review only



Follow chart of the study.

292x182mm (300 x 300 DPI)

Review only



STANDARD PROTOCOL ITEMS: RECOMMENDATIONS FOR INTERVENTIONAL TRIALS

SPIRIT 2013 Checklist: Recommended items to address in a clinical trial protocol and related documents\*

| Section/item                      | Item No | Description                                                                                                                                                                                                                                                                              | Addressed on page number |
|-----------------------------------|---------|------------------------------------------------------------------------------------------------------------------------------------------------------------------------------------------------------------------------------------------------------------------------------------------|--------------------------|
| <b>Administrative information</b> |         |                                                                                                                                                                                                                                                                                          |                          |
| Title                             | 1       | Descriptive title identifying the study design, population, interventions, and, if applicable, trial acronym                                                                                                                                                                             | ___ 1 ___                |
| Trial registration                | 2a      | Trial identifier and registry name. If not yet registered, name of intended registry                                                                                                                                                                                                     | ___ 3 ___                |
|                                   | 2b      | All items from the World Health Organization Trial Registration Data Set                                                                                                                                                                                                                 | ___ NA ___               |
| Protocol version                  | 3       | Date and version identifier                                                                                                                                                                                                                                                              | ___ 11 ___               |
| Funding                           | 4       | Sources and types of financial, material, and other support                                                                                                                                                                                                                              | ___ NA ___               |
| Roles and responsibilities        | 5a      | Names, affiliations, and roles of protocol contributors                                                                                                                                                                                                                                  | ___ 1 ___                |
|                                   | 5b      | Name and contact information for the trial sponsor                                                                                                                                                                                                                                       | ___ NA ___               |
|                                   | 5c      | Role of study sponsor and funders, if any, in study design; collection, management, analysis, and interpretation of data; writing of the report; and the decision to submit the report for publication, including whether they will have ultimate authority over any of these activities | ___ NA ___               |
|                                   | 5d      | Composition, roles, and responsibilities of the coordinating centre, steering committee, endpoint adjudication committee, data management team, and other individuals or groups overseeing the trial, if applicable (see Item 21a for data monitoring committee)                         | ___ 10, 12 ___           |

1 **Introduction**

2

3 Background and 6a Description of research question and justification for undertaking the trial, including summary of relevant 4-5  
 4 rationale studies (published and unpublished) examining benefits and harms for each intervention  
 5  
 6 6b Explanation for choice of comparators 5  
 7  
 8 Objectives 7 Specific objectives or hypotheses 5-6  
 9  
 10 Trial design 8 Description of trial design including type of trial (eg, parallel group, crossover, factorial, single group),  
 11 allocation ratio, and framework (eg, superiority, equivalence, noninferiority, exploratory) 6  
 12  
 13  
 14

15 **Methods: Participants, interventions, and outcomes**

16

17 Study setting 9 Description of study settings (eg, community clinic, academic hospital) and list of countries where data will 6  
 18 be collected. Reference to where list of study sites can be obtained  
 19  
 20 Eligibility criteria 10 Inclusion and exclusion criteria for participants. If applicable, eligibility criteria for study centres and 6-7  
 21 individuals who will perform the interventions (eg, surgeons, psychotherapists)  
 22  
 23 Interventions 11a Interventions for each group with sufficient detail to allow replication, including how and when they will be 8-9  
 24 administered  
 25  
 26 11b Criteria for discontinuing or modifying allocated interventions for a given trial participant (eg, drug dose 9  
 27 change in response to harms, participant request, or improving/worsening disease)  
 28  
 29 11c Strategies to improve adherence to intervention protocols, and any procedures for monitoring adherence 8  
 30 (eg, drug tablet return, laboratory tests)  
 31  
 32 11d Relevant concomitant care and interventions that are permitted or prohibited during the trial NA  
 33  
 34 Outcomes 12 Primary, secondary, and other outcomes, including the specific measurement variable (eg, systolic blood 10-11  
 35 pressure), analysis metric (eg, change from baseline, final value, time to event), method of aggregation (eg, median, proportion), and time point for each outcome. Explanation of the clinical relevance of chosen  
 36 efficacy and harm outcomes is strongly recommended  
 37  
 38 Participant timeline 13 Time schedule of enrolment, interventions (including any run-ins and washouts), assessments, and visits for Figure 1  
 39 participants. A schematic diagram is highly recommended (see Figure)  
 40  
 41  
 42  
 43  
 44  
 45  
 46  
 47

1 Sample size 14 Estimated number of participants needed to achieve study objectives and how it was determined, including \_\_\_\_\_7\_\_\_\_\_  
 2 clinical and statistical assumptions supporting any sample size calculations

4 Recruitment 15 Strategies for achieving adequate participant enrolment to reach target sample size \_\_\_\_\_6\_\_\_\_\_

7 **Methods: Assignment of interventions (for controlled trials)**

9 Allocation:

11 Sequence 16a Method of generating the allocation sequence (eg, computer-generated random numbers), and list of any \_\_\_\_\_7\_\_\_\_\_  
 12 generation factors for stratification. To reduce predictability of a random sequence, details of any planned restriction  
 13 (eg, blocking) should be provided in a separate document that is unavailable to those who enrol participants  
 14 or assign interventions

17 Allocation 16b Mechanism of implementing the allocation sequence (eg, central telephone; sequentially numbered, \_\_\_\_\_7\_\_\_\_\_  
 18 concealment opaque, sealed envelopes), describing any steps to conceal the sequence until interventions are assigned  
 19 mechanism

21 Implementation 16c Who will generate the allocation sequence, who will enrol participants, and who will assign participants to \_\_\_\_\_7\_\_\_\_\_  
 22 interventions

25 Blinding (masking) 17a Who will be blinded after assignment to interventions (eg, trial participants, care providers, outcome \_\_\_\_\_7\_\_\_\_\_  
 26 assessors, data analysts), and how

28 17b If blinded, circumstances under which unblinding is permissible, and procedure for revealing a participant's \_\_\_\_\_7\_\_\_\_\_  
 29 allocated intervention during the trial

32 **Methods: Data collection, management, and analysis**

34 Data collection 18a Plans for assessment and collection of outcome, baseline, and other trial data, including any related \_\_\_\_\_10\_\_\_\_\_  
 35 methods processes to promote data quality (eg, duplicate measurements, training of assessors) and a description of  
 36 study instruments (eg, questionnaires, laboratory tests) along with their reliability and validity, if known.  
 37 Reference to where data collection forms can be found, if not in the protocol

40 18b Plans to promote participant retention and complete follow-up, including list of any outcome data to be \_\_\_\_\_10\_\_\_\_\_  
 41 collected for participants who discontinue or deviate from intervention protocols

|    |                                 |     |                                                                                                                                                                                                                                                                                                                                       |                 |
|----|---------------------------------|-----|---------------------------------------------------------------------------------------------------------------------------------------------------------------------------------------------------------------------------------------------------------------------------------------------------------------------------------------|-----------------|
| 1  | Data management                 | 19  | Plans for data entry, coding, security, and storage, including any related processes to promote data quality (eg, double data entry; range checks for data values). Reference to where details of data management procedures can be found, if not in the protocol                                                                     | _____10_____    |
| 2  |                                 |     |                                                                                                                                                                                                                                                                                                                                       |                 |
| 3  |                                 |     |                                                                                                                                                                                                                                                                                                                                       |                 |
| 4  |                                 |     |                                                                                                                                                                                                                                                                                                                                       |                 |
| 5  | Statistical methods             | 20a | Statistical methods for analysing primary and secondary outcomes. Reference to where other details of the statistical analysis plan can be found, if not in the protocol                                                                                                                                                              | _____8_____     |
| 6  |                                 |     |                                                                                                                                                                                                                                                                                                                                       |                 |
| 7  |                                 |     |                                                                                                                                                                                                                                                                                                                                       |                 |
| 8  |                                 | 20b | Methods for any additional analyses (eg, subgroup and adjusted analyses)                                                                                                                                                                                                                                                              | _____NA_____    |
| 9  |                                 |     |                                                                                                                                                                                                                                                                                                                                       |                 |
| 10 |                                 | 20c | Definition of analysis population relating to protocol non-adherence (eg, as randomised analysis), and any statistical methods to handle missing data (eg, multiple imputation)                                                                                                                                                       | _____8_____     |
| 11 |                                 |     |                                                                                                                                                                                                                                                                                                                                       |                 |
| 12 |                                 |     |                                                                                                                                                                                                                                                                                                                                       |                 |
| 13 |                                 |     |                                                                                                                                                                                                                                                                                                                                       |                 |
| 14 |                                 |     |                                                                                                                                                                                                                                                                                                                                       |                 |
| 15 | <b>Methods: Monitoring</b>      |     |                                                                                                                                                                                                                                                                                                                                       |                 |
| 16 |                                 |     |                                                                                                                                                                                                                                                                                                                                       |                 |
| 17 | Data monitoring                 | 21a | Composition of data monitoring committee (DMC); summary of its role and reporting structure; statement of whether it is independent from the sponsor and competing interests; and reference to where further details about its charter can be found, if not in the protocol. Alternatively, an explanation of why a DMC is not needed | _____9, 11_____ |
| 18 |                                 |     |                                                                                                                                                                                                                                                                                                                                       |                 |
| 19 |                                 |     |                                                                                                                                                                                                                                                                                                                                       |                 |
| 20 |                                 |     |                                                                                                                                                                                                                                                                                                                                       |                 |
| 21 |                                 |     |                                                                                                                                                                                                                                                                                                                                       |                 |
| 22 |                                 | 21b | Description of any interim analyses and stopping guidelines, including who will have access to these interim results and make the final decision to terminate the trial                                                                                                                                                               | _____9_____     |
| 23 |                                 |     |                                                                                                                                                                                                                                                                                                                                       |                 |
| 24 |                                 |     |                                                                                                                                                                                                                                                                                                                                       |                 |
| 25 |                                 |     |                                                                                                                                                                                                                                                                                                                                       |                 |
| 26 | Harms                           | 22  | Plans for collecting, assessing, reporting, and managing solicited and spontaneously reported adverse events and other unintended effects of trial interventions or trial conduct                                                                                                                                                     | _____9_____     |
| 27 |                                 |     |                                                                                                                                                                                                                                                                                                                                       |                 |
| 28 |                                 |     |                                                                                                                                                                                                                                                                                                                                       |                 |
| 29 | Auditing                        | 23  | Frequency and procedures for auditing trial conduct, if any, and whether the process will be independent from investigators and the sponsor                                                                                                                                                                                           | _____9_____     |
| 30 |                                 |     |                                                                                                                                                                                                                                                                                                                                       |                 |
| 31 |                                 |     |                                                                                                                                                                                                                                                                                                                                       |                 |
| 32 |                                 |     |                                                                                                                                                                                                                                                                                                                                       |                 |
| 33 | <b>Ethics and dissemination</b> |     |                                                                                                                                                                                                                                                                                                                                       |                 |
| 34 |                                 |     |                                                                                                                                                                                                                                                                                                                                       |                 |
| 35 | Research ethics approval        | 24  | Plans for seeking research ethics committee/institutional review board (REC/IRB) approval                                                                                                                                                                                                                                             | _____12_____    |
| 36 |                                 |     |                                                                                                                                                                                                                                                                                                                                       |                 |
| 37 |                                 |     |                                                                                                                                                                                                                                                                                                                                       |                 |
| 38 | Protocol amendments             | 25  | Plans for communicating important protocol modifications (eg, changes to eligibility criteria, outcomes, analyses) to relevant parties (eg, investigators, REC/IRBs, trial participants, trial registries, journals, regulators)                                                                                                      | _____11_____    |
| 39 |                                 |     |                                                                                                                                                                                                                                                                                                                                       |                 |
| 40 |                                 |     |                                                                                                                                                                                                                                                                                                                                       |                 |
| 41 |                                 |     |                                                                                                                                                                                                                                                                                                                                       |                 |
| 42 |                                 |     |                                                                                                                                                                                                                                                                                                                                       |                 |
| 43 |                                 |     |                                                                                                                                                                                                                                                                                                                                       |                 |
| 44 |                                 |     |                                                                                                                                                                                                                                                                                                                                       |                 |
| 45 |                                 |     |                                                                                                                                                                                                                                                                                                                                       |                 |
| 46 |                                 |     |                                                                                                                                                                                                                                                                                                                                       |                 |
| 47 |                                 |     |                                                                                                                                                                                                                                                                                                                                       |                 |

|    |                               |     |                                                                                                                                                                                                                                                                                     |                |
|----|-------------------------------|-----|-------------------------------------------------------------------------------------------------------------------------------------------------------------------------------------------------------------------------------------------------------------------------------------|----------------|
| 1  | Consent or assent             | 26a | Who will obtain informed consent or assent from potential trial participants or authorised surrogates, and how (see Item 32)                                                                                                                                                        | _____ 12 _____ |
| 2  |                               |     |                                                                                                                                                                                                                                                                                     |                |
| 3  |                               |     |                                                                                                                                                                                                                                                                                     |                |
| 4  |                               | 26b | Additional consent provisions for collection and use of participant data and biological specimens in ancillary studies, if applicable                                                                                                                                               | _____ NA _____ |
| 5  |                               |     |                                                                                                                                                                                                                                                                                     |                |
| 6  |                               |     |                                                                                                                                                                                                                                                                                     |                |
| 7  | Confidentiality               | 27  | How personal information about potential and enrolled participants will be collected, shared, and maintained in order to protect confidentiality before, during, and after the trial                                                                                                | _____ 10 _____ |
| 8  |                               |     |                                                                                                                                                                                                                                                                                     |                |
| 9  |                               |     |                                                                                                                                                                                                                                                                                     |                |
| 10 | Declaration of interests      | 28  | Financial and other competing interests for principal investigators for the overall trial and each study site                                                                                                                                                                       | _____ 12 _____ |
| 11 |                               |     |                                                                                                                                                                                                                                                                                     |                |
| 12 |                               |     |                                                                                                                                                                                                                                                                                     |                |
| 13 |                               |     |                                                                                                                                                                                                                                                                                     |                |
| 14 | Access to data                | 29  | Statement of who will have access to the final trial dataset, and disclosure of contractual agreements that limit such access for investigators                                                                                                                                     | _____ 10 _____ |
| 15 |                               |     |                                                                                                                                                                                                                                                                                     |                |
| 16 |                               |     |                                                                                                                                                                                                                                                                                     |                |
| 17 | Ancillary and post-trial care | 30  | Provisions, if any, for ancillary and post-trial care, and for compensation to those who suffer harm from trial participation                                                                                                                                                       | _____ NA _____ |
| 18 |                               |     |                                                                                                                                                                                                                                                                                     |                |
| 19 |                               |     |                                                                                                                                                                                                                                                                                     |                |
| 20 | Dissemination policy          | 31a | Plans for investigators and sponsor to communicate trial results to participants, healthcare professionals, the public, and other relevant groups (eg, via publication, reporting in results databases, or other data sharing arrangements), including any publication restrictions | _____ 10 _____ |
| 21 |                               |     |                                                                                                                                                                                                                                                                                     |                |
| 22 |                               |     |                                                                                                                                                                                                                                                                                     |                |
| 23 |                               |     |                                                                                                                                                                                                                                                                                     |                |
| 24 |                               |     |                                                                                                                                                                                                                                                                                     |                |
| 25 |                               | 31b | Authorship eligibility guidelines and any intended use of professional writers                                                                                                                                                                                                      | _____ NA _____ |
| 26 |                               |     |                                                                                                                                                                                                                                                                                     |                |
| 27 |                               | 31c | Plans, if any, for granting public access to the full protocol, participant-level dataset, and statistical code                                                                                                                                                                     | _____ 10 _____ |
| 28 |                               |     |                                                                                                                                                                                                                                                                                     |                |
| 29 |                               |     |                                                                                                                                                                                                                                                                                     |                |
| 30 | <b>Appendices</b>             |     |                                                                                                                                                                                                                                                                                     |                |
| 31 |                               |     |                                                                                                                                                                                                                                                                                     |                |
| 32 | Informed consent materials    | 32  | Model consent form and other related documentation given to participants and authorised surrogates                                                                                                                                                                                  | _____ 12 _____ |
| 33 |                               |     |                                                                                                                                                                                                                                                                                     |                |
| 34 |                               |     |                                                                                                                                                                                                                                                                                     |                |
| 35 | Biological specimens          | 33  | Plans for collection, laboratory evaluation, and storage of biological specimens for genetic or molecular analysis in the current trial and for future use in ancillary studies, if applicable                                                                                      | _____ NA _____ |
| 36 |                               |     |                                                                                                                                                                                                                                                                                     |                |
| 37 |                               |     |                                                                                                                                                                                                                                                                                     |                |

38  
39 \*It is strongly recommended that this checklist be read in conjunction with the SPIRIT 2013 Explanation & Elaboration for important clarification on the items.  
40 Amendments to the protocol should be tracked and dated. The SPIRIT checklist is copyrighted by the SPIRIT Group under the Creative Commons  
41 "[Attribution-NonCommercial-NoDerivs 3.0 Unported](https://creativecommons.org/licenses/by-nc-nd/3.0/)" license.  
42  
43  
44
